# Supplementary material for: The effectiveness of various computer-based interventions for patients with chronic pain or functional somatic syndromes: A systematic review and meta-analysis
Source: PubMed Central journal article supplement (PMC5955495; doi:10.1371/journal.pone.0196467), 2018-05-16
Supplement: pone.0196467.s002.pdf [file pone.0196467.s002.pdf]

## S1 Appendix: Additional details on methods and results

### Table of Contents

|                                                                                                                                                            |    |
|------------------------------------------------------------------------------------------------------------------------------------------------------------|----|
| Table A: Search string for EMBASE & MEDLINE via OVID.....                                                                                                  | 2  |
| Table B: Assessments of high (red), unclear (orange), or low (green) risk of bias by all criteria.....                                                     | 5  |
| Table C: Outcome measures extracted by studies for each outcome category.....                                                                              | 7  |
| Table D: Coding results for use of theory (1), individual BCTs (2), and modes of delivery (3).....                                                         | 9  |
| 1. Use of theory.....                                                                                                                                      | 9  |
| 2. Behavioral change techniques (BCTs).....                                                                                                                | 11 |
| 3. Modes of delivery.....                                                                                                                                  | 13 |
| Overview of meta-analyses; <i>SMDs</i> , 95% confidence intervals, heterogeneity statistics, forest plots and funnel plots), and sensitivity analyses..... | 14 |
| Comparison 1: Computer-based interventions versus passive controls (tables F-O, figs A-N).....                                                             | 14 |
| Outcome 1.1: Symptom intensity (post).....                                                                                                                 | 14 |
| Outcome 1.2: Health-related Quality Of Life (post).....                                                                                                    | 17 |
| Outcome 1.3: Functional interference (post).....                                                                                                           | 20 |
| Outcome 1.4: Catastrophizing (post).....                                                                                                                   | 23 |
| Outcome 1.5: Depression (post).....                                                                                                                        | 26 |
| Outcome 1.6: Symptom intensity (6 or more months at follow-up).....                                                                                        | 29 |
| Outcome 1.7 HRQOL (6 or more months at follow-up).....                                                                                                     | 30 |
| Outcome 1.8 Functional interference (6 or more months at follow-up).....                                                                                   | 31 |
| Outcome 1.9 Catastrophizing (6 or more months at follow-up).....                                                                                           | 32 |
| Outcome 1.10: Depression (6 or more months at follow-up).....                                                                                              | 33 |
| Comparison 2: Computer based versus active control (tables P-Y, and figs O-AB).....                                                                        | 34 |
| Outcome 2.1: Symptom intensity (post).....                                                                                                                 | 34 |
| Outcome 2.2: Health-related Quality Of Life (post).....                                                                                                    | 37 |
| Outcome 2.3: Functional interference (post).....                                                                                                           | 40 |
| Outcome 2.4: Catastrophizing (post).....                                                                                                                   | 43 |
| Outcome 2.5: Depression (post).....                                                                                                                        | 46 |
| Outcome 2.6: Symptom intensity (6 or more months at follow-up).....                                                                                        | 49 |
| Outcome 2.7: HRQOL (6 or more months at follow-up).....                                                                                                    | 50 |
| Outcome 2.8: Functional interference (6 or more months at follow-up).....                                                                                  | 51 |
| Outcome 2.9: Catastrophizing (6 or more months at follow-up).....                                                                                          | 52 |
| Outcome 2.10: Depression (6 or more months at follow-up).....                                                                                              | 53 |
| Table Z: Characteristics of sub-sets of studies with the 25% highest and 25% lowest <i>SMD</i> estimates.....                                              | 54 |
| Table AA: Overview of sub-group analyses.....                                                                                                              | 56 |

**Table A: Search string for EMBASE & MEDLINE via OVID**

<patient condition>  
1 Somatoform Disorder/  
2 Psychosomatics/  
3 Neurasthenia/  
4 somati#ation.ti,ab.  
5 somatoform.ti,ab.  
6 neurasthen\$.ti,ab.  
7 neurasthen\$.ti,ab.  
8 psychophysiologic\$.ti,ab.  
9 psychosomat\$.ti,ab.  
10 psychogen\$.ti,ab.  
11 (non organic\$ or nonorganic\$.ti,ab.  
12 (unexplain\$ adj1 medical\$.ti,ab.  
13 (unexplain\$ adj1 (sympt\$ or problem\$ or condition\$ or complain\$)).ti,ab.  
14 ((non specific or nonspecific) adj2 (sympt\$ or problem\$ or condition\$ or complain\$)).ti,ab.  
15 ((unexplain\$ or inexpl\$) and (health\$ or medical\$ or physical\$) and (sympt\$ or problem\$ or condition\$ or complain\$)).ti,ab.  
16 (high utilis\$ or high utiliz\$.ti,ab.  
17 (functional somatic adj2 (sympt\$ or syndr\$)).ti,ab.  
18 Fibromyalgia/  
19 fibromyalgi\$.ti,ab.  
20 chronic widespread pain.ti,ab.  
21 Fatigue Syndrome, Chronic/  
22 fatigue syndrome.ti,ab.  
23 ((non cardiac or noncardiac or non specific or nonspecific) adj2 chest pain).ti,ab.  
24 NCCP.ti,ab.  
25 Irritable Colon/  
26 (IBS or irritable bowel syndrome\$.ti,ab.  
27 multiple chemical sensitivity.mp.  
28 idiopathic environmental intolerance.ti,ab.  
29 Premenstrual Syndrome/  
30 (premenstrual adj2 (syndrome\$ or tension\$)).ti,ab.  
31 ((non ulcer nonulcer or functional) adj2 dyspepsia).ti,ab.  
32 exp Cumulative Trauma Disorders/  
33 cumulative trauma disorder\$.ti,ab.  
34 repe\$ strain injur\$.ti,ab.  
35 ((tension type or idiopathic or psychogenic) adj2 headache\$.ti,ab.  
36 Temporomandibular Joint Disorders/  
37 ((temporomandibular joint or TMJ) adj2 (disease\$ or disorder\$ or dysfunction\$)).ti,ab.  
38 HYPOCHONDRIASIS/  
39 NEUROCIRCULATORY ASTHENIA/  
40 (somati#ing or somati#ed or somatic symptom\$ or somatic syndrome\$ or symptom syndrome\$ or multisomat\$ or hypochondria\$.ti,ab.  
41 ((medic\$ adj3 (unexplain\$ or inexplic\$)) or unexplained symptom\$.ti,ab.  
42 (((frequent or high) adj1 attend\$) or high utili#er\$ or repeat\$ present\$.ti,ab.  
43 functional symptoms.ti,ab.  
44 reattribution.ti,ab.  
45 exp ABDOMINAL PAIN/  
46 stomach ache\$.ti,ab.  
47 exp BACK PAIN/  
48 COLONIC DISEASES, FUNCTIONAL/  
49 CYSTITIS, INTERSTITIAL/  
50 painful bladder syndrome.ti,ab.  
51 urethral syndrome.ti,ab.  
52 cardiac neuros\$.ti,ab.  
53 ((non cardiac or noncardiac or non-cardiac) adj chest pain).ti,ab.  
54 ((nonorganic or non organic or non-organic) adj pain).ti,ab.  
55 effort syndrome.ti,ab.

56 DIZZINESS/  
57 myalgic encephalomyel\$.ti,ab.  
58 ((post viral or postviral or post-viral) adj (fatigue or syndrome)).ti,ab.  
59 exp HEADACHE/  
60 exp HEADACHE DISORDERS/  
61 exp HYPERVENTILATION/  
62 exp HYSTERIA/  
63 Briquet\* syndrome.ti,ab.  
64 IRRITABLE BOWEL SYNDROME/  
65 MULTIPLE CHEMICAL SENSITIVITY/  
66 exp PELVIC PAIN/  
67 PSYCHOPHYSIOLOGIC DISORDERS/  
68 (psychalgia or psychogenic or psychoseizure\$ or psychosomatic).ti,ab.  
69 TEMPOROMANDIBULAR JOINT DYSFUNCTION SYNDROM/  
70 or/1-69

<Intervention>

71 exp COMPUTER/ or exp MICROCOMPUTER/ or exp INTERNET/ or INTERNET-PROTOCOL/ or LOCAL-AREA-NETWORK/ or COMPUTER-NETWORK/ or MEDICAL-INFORMATICS/ or EDUCATIONAL-TECHNOLOGY/ or AUDIOVISUAL-EQUIPMENT/ or DECISION-MAKING/ or DECISION-SUPPORT-SYSTEM/ or DECISION-TREE/ or DECISIONTHEORY/ or COMPUTER-PROGRAM/ or exp TELECOMMUNICATION/ or exp MULTIMEDIA/ or COMPACT-DISK/ or COMPUTER-ASSISTED-THERAPY/ or COMPUTER-PROGRAM/ or HUMAN-COMPUTER-INTERACTION/ or COMPUTER-INTERFACE/ or COMPUTER-NETWORK/ or ONLINE-SYSTEM/ or ONLINE-SYSTEM/ or MEDICAL-INFORMATICS/ or MOBILE-PHONE/ or COMPUTER-GRAPHICS/ or VIRTUAL-REALITY/ (561689)

72 (COMPUTER\* or INTERNET or CD-ROM or CDROM or (CELLULAR adj PHONE) or (CELLULAR adj TELEPHONE) or (MOBILE adj PHONE) or (MOBILE adj TELEPHONE) or ((ELECTRONIC adj MAIL) or EMAIL or E-MAIL) or HYPERMEDIA or (VIDEO adj GAME\*) or (VIDEO adj RECORDING) or DVD or (WORLD adj WIDE adj WEB) or WORLD-WIDE-WEB or (WORLD-WIDE adj WEB) or (WORLDWIDE adj WEB) or (WEB adj SITE) or WEBSITE or (ONLINE or ON-LINE) or (CHAT adj ROOM) or CHATROOM or BLOG\* or WEB-LOG\* or WEBLOG\* or (BULLETIN adj BOARD\*) or BULLETINBOARD\* or MESSAGEBOARD\* or (MESSAGE adj BOARD\*) or (INTERACTIVE adj HEALTH adj COMMUNICATION\*) or (INTERACTIVE adj (TELEVIS\* or VIDEO or TECHNOLOGY or MULTIMEDIA) or E-HEALTH or EHEALTH or EHEALTH or (ELECTRONIC adj HEALTH) or (CONSUMER adj HEALTH adj INFORMATIC\*) or (VIRTUAL adj REALITY) or (SURF\* and (WEB\* or INTERNET))).ti. (115754)

73 71 or 72

74 exp Self Care/ or exp Patient Education/ or exp Patient Participation/ or exp Consumer/ or exp EMPOWERMENT/ or exp REHABILITATION/ or exp Daily Life Activity/ or exp Social Support/ or exp Coping Behavior/ or exp Behavior Therapy/

75 (((self or symptom\*) adj (care or help or manag\* or directed or monitor\* or efficacy or admin\*)) or ((health or patient\*) adj2 (educat\* or information)) or ((patient\* or consumer\*) adj part\*) or (holistic or wholistic) or rehab\* or (activit\* adj2 daily adj living) or (social adj (support or network\*)) or (support adj system\*) or (psychologic\* adj (adjust\* or adapt\*)) or (cope or copes or coping) or (adapt\* adj behav\*) or (behav\* adj (theraP or intervention\*))).ti.

76 74 or 75

77 exp Abreaction/ or abreaction.mp. or exp Adaptation, Psychological/ or (Psychological adj Adaptation).mp. or exp aromatherapy/ or aromatheraP.mp. or exp art therapy/ or exp autogenic training/ or (autogenic adj train\*).mp. or exp autosuggestion/ or exp Aversive Therapy/ or exp behavior therapy/ or exp bibliotherapy/ or bibliotheraP.mp. or exp biofeedback, psychology/ or Biofeedback.mp. or exp catharsis/ or catharsis.mp. or exp conditioning/ or conditioning.mp. or exp conditioning, classical/ or (classical adj conditioning).mp. or exp conditioning, operant/ or (operant adj conditioning).mp.

78 exp Cognitive Therapy/ or exp color therapy/ or exp Counseling/ or counsel?ing.mp. or exp Couples Therapy/ or exp crisis intervention/ or (crisis adj intervention).mp. or exp dance therapy/ or exp Desensitization, Psychologic/ or Desensiti?ation.mp. or exp Early Intervention/ or Early Intervention.mp. or exp Exercise Therapy/ or exp Eye Movement Desensitization Reprocessing/ or (Eye Movement adj2 (Desensiti?ation or Reprocessing)).mp. or exp Family Therapy/ or exp feedback, psychological/ or exp free association/ or (free adj association).mp. or exp gestalt therapy/ or exp hypnosis/ or hypnosis.mp. or exp imagery/ or imagery.mp. or exp implosive therapy/ or exp Intervention Studies/ or exp marital therapy/ or exp meditation/ or meditation.mp. or exp milieu therapy/ or exp music therapy/ or exp nondirective therapy/

79 exp play therapy/ or exp psychoanalytic therapy/ or exp psychodrama/ or psychodrama.mp. or exp psychotherapeutic processes/ or (psychotheraP adj process\*).mp. or exp psychotherapy/ or psychotheraP.mp. or exp psychotherapy, brief/ or exp Psychotherapy, Group/ or exp psychotherapy, multiple/ or exp psychotherapy, rational-emotive/ or exp reality therapy/ or exp residential treatment/ or (residential adj treatment?).mp. or exp socioenvironmental therapy/ or exp suggestion/ or exp systems theory/ or exp therapeutic community/ or exp transactional analysis/ or (transactional adj analysis).mp.

80 ((Acceptance commitment or Art or Assertive or autosuggestion or Aversive or Behav\$ or Client cent\$ or Cognitive or Colo?r or Compassion\$ or couples or dance or Directive or Exercise or Family or gestalt or Human Givens or Humanistic or

implosive or Interpersonal or marital or mentalization or milieu or music or nondirective or patient centered or play or psychoanalytic or rational? emotive or reality or socio?environmental or suggestion or systemic or systems or therapeutic community) adj2 therap\$).mp.

81 (Behav\$ modification or Compassionate Mind Train\$ or Emotional freedom tapping or Flooding or Mindfulness or Psychodynamic or Rewind technique? or Stress manag\$).mp.

82 74 or 75 or 77 or 78 or 79 or 80 or 81

<Study type:>

83. COMPARATIVE-STUDY/

84. FOLLOW-UP/

85. PROSPECTIVE-STUDY/

86 (CONTROL\$ or PROSPECTIV\$ or VOLUNTEERS\$).ti,ab.

87. factorial\$.ti,ab.

88. random\$.ti,ab.

89. (crossover\$ or cross over\$ or cross-over\$).ti,ab.

90. placebo\$.ti,ab.

91. (doubl\$ adj blind\$).ti,ab.

92. (singl\$ adj blind\$).ti,ab.

93. assign\$.ti,ab.

94. allocat\$.ti,ab.

95. volunteer\$.ti,ab.

96. crossover procedure.sh.

97. double blind procedure.sh.

98. randomized controlled trial.sh.

99. single blind procedure.sh.

100. (CONTROL\$ or PROSPECTIV\$ or VOLUNTEERS\$).ti.

101. CONTROLLED-CLINICAL-TRIAL/

102. CLINICAL-TRIAL/

103. exp RANDOMIZATION/

104. (CLINIC\$ adj25 TRIAL\$).ti,ab.

105. (COMPARATIVE adj STUDY).ti.

106. exp evaluation/

107. ((time adj series) or (pre test or pretest or (post test or posttest))).tw.

108. exp animal/ or nonhuman/ or exp animal experiment/

109. exp human/

110. or/83-109

111. 108 and 109

112. 108 not 111

113. 110 not 112

114. 70 and 73 and 82 and 113

**Table B: Assessments of high (red), unclear (orange), or low (green) risk of bias by all criteria**

“High risk” or “low risk” were assigned if available information shows that a criterion of the risk of bias tool had or had not been met, and “unclear” was assigned if information was insufficient for objective assessment. The following agreements were made based on a (further) objectification of the 13 criteria:

- **Dissimilarity at baseline** was assessed by the results of statistical tests based on the following variables; primary outcome, severity/duration of somatic symptoms, age, gender, and employment/education.
- Low risk was scored if **attrition** rates were under 5% (post) or 10% (follow-up). Plausible standardized mean differences for missing outcome observations could not be established.
- For interpretation of the “acceptability” of **compliance**, it was agreed (a priori) to consider program duration, proportions of allocated participants that completed (at least 80%) the intervention for each group, and if compliance was monitored such that inadequate use could be observed. Objective assessment was complicated by differences in program duration and how usage/compliance was reported. After discussion, reasons for assigning high instead of low risk were: important differences in compliance between groups, a large number (more than half) of the intervention group participants stopped before completing (at least 80%) of a 3-12 week CBI. “Unclear” is assessed when compliance could not be judged by comparable standards (a CBI of longer duration was completed by less than half of the participants, if there was no monitoring, or usage was indicated in a completely different way).
- “Preregistered” as in the criterion for risk of reporting bias due to **selective outcome reporting** was interpreted as; registered before the end of data collections (note that some studies registered or updated a protocol between the start and end of data collection).
- Risk of bias due to **incomplete reporting and analysis** according to group allocation was assessed for:
  - o Primary analysis performed: “low risk” means intention-to-treat analysis were presented (or sensitivity analysis showed that primary complete case analyses results did not differ);
  - o data available for extraction (low risk is assigned if means and standard deviations are based on all participants that were allocated to the experimental groups (e.g. after adequate imputation of missing data)
- High risk due to different co-interventions between groups is assigned if intervention group participants were offered general information or training for using technology (not specific to the program under investigation). Other possible co-interventions, e.g. medication, were not considered.
- Other bias was coded high for studies with a small sample size (n<50).

[https://back.cochrane.org/sites/back.cochrane.org/files/public/uploads/PDF/ROB%20criteria\\_Aug2011.pdf](https://back.cochrane.org/sites/back.cochrane.org/files/public/uploads/PDF/ROB%20criteria_Aug2011.pdf)

|                                          | Other bias (n<50) | Detection bias | Timing of outcome assessment | Blinding of outcome assessor | Bias due to <b>incomplete reporting</b> according to group allocation | Bias due to <b>incomplete analysis</b> according to group allocation | Performance bias | Compliance with interventions across groups | Similarity of co-interventions across groups | Blinding of personnel/care providers | Blinding of participants | Reporting bias (selective outcome reporting) | Attrition bias | Selection bias | Group similarity at baseline | Allocation concealment | Random sequence generation |
|------------------------------------------|-------------------|----------------|------------------------------|------------------------------|-----------------------------------------------------------------------|----------------------------------------------------------------------|------------------|---------------------------------------------|----------------------------------------------|--------------------------------------|--------------------------|----------------------------------------------|----------------|----------------|------------------------------|------------------------|----------------------------|
| <b>First author, year of publication</b> |                   |                |                              |                              |                                                                       |                                                                      |                  |                                             |                                              |                                      |                          |                                              |                |                |                              |                        |                            |
| Abbott, 2009                             |                   |                |                              |                              |                                                                       |                                                                      |                  |                                             |                                              |                                      |                          |                                              |                |                |                              |                        |                            |
| Andersson, 2002                          |                   |                |                              |                              |                                                                       |                                                                      |                  |                                             |                                              |                                      |                          |                                              |                |                |                              |                        |                            |
| Andersson, 2003                          |                   |                |                              |                              |                                                                       |                                                                      |                  |                                             |                                              |                                      |                          |                                              |                |                |                              |                        |                            |
| Boer, de, 2014                           |                   |                |                              |                              |                                                                       |                                                                      |                  |                                             |                                              |                                      |                          |                                              |                |                |                              |                        |                            |
| Brattberg, 2006                          |                   |                |                              |                              |                                                                       |                                                                      |                  |                                             |                                              |                                      |                          |                                              |                | *1             |                              |                        |                            |

|                       |        |        |        |        |        |        |        |       |       |        |        |        |       |        |        |        |
|-----------------------|--------|--------|--------|--------|--------|--------|--------|-------|-------|--------|--------|--------|-------|--------|--------|--------|
| Buhrman, 2004         | Green  | Yellow | Red    | Red    | Red    | Yellow | Red    | Red   | Green | Green  | Yellow | Red    | Red   | Green  | Green  | Green  |
| Buhrman, 2011         | Green  | Green  | Green  | Green  | Yellow | Yellow | Red    | Red   | Green | Green  | Green  | Red    | Red   | Green  | Green  | Green  |
| Buhrman, 2013         | Green  | Green  | Red    | Red    | Red    | Yellow | Red    | Red   | Green | Yellow | Yellow | Green  | Green | Red    | Green  | Green  |
| Buhrman, 2013b        | Green  | Green  | Yellow | Yellow | Red    | Yellow | Red    | Red   | Green | Yellow | Yellow | Green  | Green | Red    | Green  | Green  |
| Buhrman, 2015         | Green  | Green  | Red    | Red    | Green  | Yellow | Red    | Red   | Green | Red    | Red    | Green  | Green | Red    | Green  | Green  |
| Camerini, 2012        | Green  | Yellow | Yellow | Yellow | Red    | Yellow | Yellow | Red   | Green | Red    | Red    | Yellow | Red   | Yellow | Green  | Green  |
| Carpenter, 2012       | Green  | Green  | Yellow | Yellow | Red    | Yellow | Red    | Green | Green | Green  | Yellow | Red    | Red   | Green  | Green  | Green  |
| Chiauzzi, 2010        | Yellow | Yellow | Red    | Red    | Red    | Yellow | Red    | Green | Green | Yellow | Yellow | Green  | Green | Red    | Green  | Green  |
| Davis, 2013           | Green  | Green  | Green  | Green  | Yellow | Yellow | Red    | Red   | Green | Red    | Red    | Green  | Red   | Red    | Green  | Green  |
| Dear, 2013            | Yellow | Yellow | Green  | Yellow | Green  | Green  | Red    | Red   | Green | Green  | Green  | Green  | Red   | Green  | Green  | Green  |
| Dear, 2015            | Green  | Green  | Green  | Green  | Yellow | Green  | Red    | Red   | Green | Green  | Green  | Green  | Red   | Green  | Green  | Green  |
| Devenini, 2005        | Yellow | Yellow | Yellow | Yellow | Red    | Yellow | Red    | Red   | Green | Yellow | Yellow | Yellow | Red   | Red    | Yellow | Yellow |
| Dowd, 2015            | Green  | Green  | Yellow | Yellow | Red    | Yellow | Red    | Red   | Green | Red    | Red    | Green  | Red   | Red    | Green  | Green  |
| Everitt, 2013         | Green  | Green  | Red    | Red    | Yellow | Green  | Red    | Red   | Green | Red    | Red    | Green  | Red   | Red    | Green  | Green  |
| Hesser, 2012          | Green  | Green  | *2     | Green  | Green  | Yellow | Red    | Red   | Green | Green  | Green  | Green  | Red   | Red    | Green  | Green  |
| Hunt, 2009            | Yellow | Yellow | Yellow | Yellow | Red    | Yellow | Red    | Red   | Green | Red    | Red    | Red    | Red   | Red    | Green  | Red    |
| Hunt, 2015            | Yellow | Yellow | Green  | Yellow | Red    | Yellow | Red    | Red   | Green | Yellow | Yellow | Red    | Red   | Red    | Green  | Red    |
| Janse, 2016           | Green  | Green  | Yellow | Yellow | Green  | Green  | Red    | Red   | Green | Red    | Red    | Green  | Red   | Red    | Red    | Green  |
| Jasper, 2014          | Green  | Green  | Yellow | Yellow | Green  | Green  | Red    | Red   | Green | Green  | Green  | Green  | Red   | Red    | Green  | Green  |
| Kaldo, 2008           | Yellow | Yellow | Green  | Yellow | Red    | Yellow | Red    | Red   | Green | Green  | Green  | Red    | Red   | Red    | Green  | Red    |
| Krein, 2013           | Green  | Green  | Green  | Green  | Red    | Yellow | Red    | Red   | Green | Yellow | Yellow | Green  | Red   | Red    | Green  | Green  |
| Kristjánsdóttir, 2013 | Green  | Green  | Green  | Green  | Red    | Yellow | Red    | Red   | Green | Green  | Green  | Green  | Red   | Red    | Green  | Green  |
| Lee, 2014             | Yellow | Yellow | Yellow | Yellow | Red    | Yellow | Red    | Red   | Green | Yellow | Yellow | Yellow | Red   | Red    | Green  | Green  |
| Ljotsson, 2010        | Green  | Green  | Yellow | Yellow | Green  | Yellow | Red    | Red   | Green | Green  | Green  | Green  | Red   | Red    | Green  | Green  |
| Ljotsson, 2011a       | Green  | Green  | Green  | Green  | Green  | Yellow | Red    | Red   | Green | Yellow | Yellow | Green  | Red   | Red    | Green  | Green  |
| Ljotsson, 2011b       | Green  | Green  | Green  | Green  | Red    | Yellow | Red    | Red   | Green | Yellow | Yellow | Green  | Red   | Red    | Green  | Green  |
| Lorig, 2008           | Yellow | Yellow | Yellow | Yellow | Red    | Yellow | Red    | Red   | Green | Green  | Green  | Green  | Red   | Red    | Green  | Green  |
| Menga, 2014           | Yellow | Yellow | Green  | Yellow | Red    | Yellow | Red    | Red   | Green | Yellow | Yellow | Yellow | Red   | Red    | Green  | Red    |
| Moessner, 2014        | Yellow | Yellow | Green  | Yellow | Red    | Yellow | Red    | Red   | Green | Green  | Green  | Green  | Red   | Red    | Green  | Green  |
| Mourad, 2016          | Green  | Green  | Red    | Red    | Green  | Green  | Red    | Red   | Green | Green  | Green  | Green  | Red   | Red    | Green  | Red    |
| Naylor, 2008          | Green  | Green  | Green  | Green  | Green  | Yellow | Red    | Red   | Green | Green  | Green  | Green  | Red   | Red    | Green  | Green  |
| Oerlemans, 2011       | Green  | Yellow | Red    | Red    | Yellow | Red    | Red    | Red   | Green | Green  | Yellow | Red    | Red   | Red    | Green  | Green  |
| Riva, 2014            | Green  | Green  | Green  | Green  | Green  | Yellow | Red    | Red   | Green | Yellow | Yellow | Green  | Red   | Red    | Green  | Green  |
| Ruehlman, 2012        | Yellow | Yellow | Green  | Yellow | Red    | Yellow | Red    | Red   | Green | Green  | Yellow | Yellow | Green | Red    | Green  | Green  |
| Schulz, 2007          | Red    | Red    | Red    | Red    | Green  | Red    | Red    | Red   | Red   | Green  | Red    | Green  | Red   | Red    | Green  | Red    |
| Strom, 2000           | Yellow | Yellow | Yellow | Yellow | Red    | Yellow | Red    | Red   | Green | Red    | Red    | Yellow | Red   | Red    | Green  | Red    |
| Trompetter, 2015      | Yellow | Yellow | Green  | Yellow | Red    | Green  | Red    | Red   | Green | Red    | Red    | Green  | Red   | Red    | Green  | Green  |
| Vallejo, 2015         | Green  | Yellow | *3     | Green  | Yellow | Yellow | Red    | Red   | Green | Green  | Green  | Green  | Red   | Red    | Green  | Red    |
| Weise, 2016           | Green  | Green  | Yellow | Yellow | Green  | Green  | Red    | Red   | Green | Green  | Green  | Green  | Red   | Red    | Green  | Green  |
| Williams, 2010        | Green  | Green  | Yellow | Yellow | Yellow | Yellow | Red    | Red   | Green | Green  | Green  | Green  | Red   | Red    | Green  | Green  |
| Wilson, 2015          | Yellow | Yellow | Yellow | Yellow | Red    | Yellow | Red    | Red   | Green | Red    | Red    | Red    | Red   | Red    | Green  | Green  |

\*1,2,3 High/unclear risk only for particular outcomes: 1; Health-related quality of life, Functional interference (FI), 2; FI, 3; FI, depression.

**Table C: Outcome measures extracted by studies for each outcome category**

| <b>Study, year of publication</b> | <b>Symptom intensity</b>        | <b>Health-related quality of life</b> | <b>Functional interference</b>      | <b>Catastrophizing</b> | <b>Depression</b>      |
|-----------------------------------|---------------------------------|---------------------------------------|-------------------------------------|------------------------|------------------------|
| Abbott 2009                       | VAS Loudness                    | WHOQOL                                | TRQ                                 |                        | DASS                   |
| Andersson 2002                    | VAS Loudness                    |                                       | TRQ                                 |                        | HADS                   |
| Andersson 2003                    | Headache intensity diary 4x 0-5 |                                       | HDI                                 |                        | HADS                   |
| Brattberg 2006                    | SF-36 bodily pain               | SF-36 general health                  | SF-36 Role-physical                 |                        | HADS                   |
| Buhrman 2004                      | MPI pain severity               |                                       | MPI interference                    | CSQ cat.               | HADS                   |
| Buhrman 2011                      | MPI pain severity               | QOLI                                  | MPI interference                    | CSQ cat.               | HADS                   |
| Buhrman 2013                      | MPI pain severity               | QOLI                                  | MPI interference                    | CSQ cat.               | HADS                   |
| Buhrman 2013a                     | MPI pain severity               | QOLI                                  | MPI interference                    | CSQ cat.               | HADS                   |
| Buhrman 2015                      | MPI pain severity               | QOLI                                  | MPI interference                    | PCS                    | MADRS-S                |
| Camerini 2012                     |                                 |                                       |                                     |                        |                        |
| Carpenter 2012                    | VAS pain intensity              |                                       | RMDQ                                | PCS rumination         |                        |
| Chiauzzi 2010                     | BPI current                     |                                       | ODQ                                 | PCS                    | DASS                   |
| de Boer 2014                      | VAS pain                        | RAND-36 General Health                | VAS interference                    | PCS                    |                        |
| Dear 2013                         | WBPQ average pain               |                                       | RMDQ                                | PRSS cat.              | PHQ-9                  |
| Dear 2015                         | WBPQ average pain               |                                       | RMDQ                                | CPAQ                   | PHQ-9                  |
| Deveneni 2005                     | Headache Index                  |                                       | HDI                                 |                        | CES-D                  |
| Dowd 2015                         | BPI pain right now              |                                       | BPI interference                    | PCS                    | HADS (total)           |
| Everitt 2013                      | IBS SSS                         | IBS QOL                               |                                     |                        | HADS                   |
| Hesser 2012                       |                                 | QOLI                                  | THI                                 | TAQ                    | HADS                   |
| Hunt 2009                         | GSRs                            | IBS QOL                               |                                     | ASI-GI                 |                        |
| Hunt 2015                         | GSRs                            | IBS QOL                               |                                     | VSI                    |                        |
| Janse 2016                        | CIS fatigue severity            |                                       | SIP 8                               |                        | SCL-90 (total)         |
| Jasper 2014                       |                                 |                                       | THI                                 | TAQ                    | HADS                   |
| Kaldo 2008                        | VAS loudness                    |                                       | THI                                 |                        | HADS                   |
| Knoop 2008                        | CIS fatigue severity            |                                       | SIP 8                               |                        |                        |
| Krein 2013                        | VAS pain                        |                                       | RMDQ                                | TSK                    |                        |
| Kristjánsdóttir 2013              | VAS Pain                        |                                       | FIQ                                 | CPAQ                   | GHQ emotional distress |
| Lee 2014                          | Pain VAS                        | SF36 general health                   | SF36 role physical                  |                        |                        |
| Ljotsson 2011                     | GSRs-IBS                        | IBS QOL                               | Sheehan Disability Scales           | VSI                    |                        |
| Ljotsson 2011a                    | GSRs-IBS                        | IBS QOL                               |                                     | VSI                    |                        |
| Ljótsson 2010                     | GSRs-IBS                        | IBS QOL                               | Sheehan disability scales           | VSI                    | MADRS-S                |
| Lorig 2008                        | Pain NRS                        | Self-reported global health           | Disability (National Health Survey) | ASES                   |                        |
| Menga 2014                        |                                 |                                       | FIQ                                 |                        |                        |
| Moessner 2014                     | Pain NRS                        | SF-36                                 | RMDQ                                |                        |                        |
| Mourad 2016                       |                                 |                                       |                                     |                        | PHQ-9                  |
| Naylor 2008                       | MPQ pain now                    |                                       | TOPS Total Pain Experience          | CSQ                    |                        |
| Oerlemans 2011                    | Abdominal pain (0-5)            |                                       |                                     | PCS                    |                        |
| Riva 2014                         | CPGS                            |                                       |                                     |                        |                        |
| Ruehlman 2012                     | PCP-S severity                  |                                       | PCP-S interference                  |                        |                        |
| Schulz 2007                       |                                 |                                       |                                     |                        |                        |
| Ström 2000                        | Headache diary peak intensity   |                                       | HDI                                 |                        |                        |

|                 |                    |  |                            |      |       |
|-----------------|--------------------|--|----------------------------|------|-------|
| Trompetter 2015 | Pain NRS           |  | MPI interference           | PCS  | HADS  |
| Vallejo 2015    |                    |  | FIQ                        | PCS  | BDI   |
| Weise 2016      |                    |  | THI                        | TAQ  | HADS  |
| Williams 2010   | BPI                |  | SF-36 physical functioning |      | CES-D |
| Wilson 2015     | BPI pain intensity |  | BPI interference           | PSEQ | PHQ8  |

VAS; Visual Analogue Scale, SF; Short-form Health Survey, MPI; Multidimensional Pain Inventory, BPI; Brief Pain Inventory, WBPQ; Wisconsin Brief Pain Questionnaire, IBS-SSS; Irritable Bowel Syndrome Symptom Severity Score, GSRS; Gastrointestinal Symptom Rating Scale, CIS; Checklist Individual Strength, MPQ; McGill Pain Questionnaire, CPGS; Chronic Pain Grading Scale, PCP-S; Profile of Chronic Pain – Screen, NRS; Numerical Rating Scale, WHOQOL; World Health Organization quality of life assessment, QOLI; Quality of Life Inventory, IBS QOL; Irritable Bowel Syndrome Quality of Life Instrument, TRQ; Tinnitus Reaction Questionnaire, HDI; Headache Disability Index, RMDQ; Roland-Morris Disability Questionnaire, THI; Tinnitus Handicap Inventory, SIP; Sickness Impact Profile, FIQ; Fibromyalgia Impact Questionnaire, TOPS; Treatment Outcomes of Pain Survey, CSQ cat.; Coping Strategies Questionnaire catastrophizing subscale, PCS; Pain Catastrophizing Scale, PRSS cat; Pain Related Control Scales catastrophizing subscale, TAQ; Tinnitus Acceptance Questionnaire, TSK; Tampa Scale of Kinesiophobia, ASI; Anxiety Sensitivity Index, VSI; Visceral Sensitivity Index, CPAQ; Chronic Pain Acceptance Questionnaire, ASES; Arthritis Self-Efficacy Scale, PSES; Pain Self-Efficacy Scale, DASS; Depression Anxiety Stress Scales, HADS; Hospital Anxiety and Depression Scale, MADRS-S; Montgomery–Åsberg Depression Rating Scale, PHQ; Patient Health Questionnaire, CES-D; Center for Epidemiological Studies Depression Scale, SCL; Symptoms Checklist, GHQ; GHQ; General Health Questionnaire, BDI; Beck Depression Inventory





|            |      |   |  |  |   |   |  |   |   |  |   |  |   |   |
|------------|------|---|--|--|---|---|--|---|---|--|---|--|---|---|
| Trompetter | 2015 | 1 |  |  | 1 | 1 |  | 1 |   |  | 1 |  | 3 | 1 |
| Vallejo    | 2015 | 1 |  |  |   |   |  |   |   |  |   |  | 2 | 0 |
| Weise      | 2016 | 1 |  |  |   |   |  |   | 1 |  |   |  | 1 | 1 |
| Williams   | 2010 | 1 |  |  |   | 1 |  | 1 |   |  |   |  | 1 | 1 |
| Wilson     | 2015 | 1 |  |  |   | 1 |  |   |   |  |   |  | 5 | 0 |

Column explanations:

- 1. Theory/model of behavior mentioned
- 2. Targeted construct mentioned as predictor of behavior
- 3. Intervention based on single theory
- 4. Use of theory predictors to select recipients for the intervention
- 5. Use of theory predictors to select/develop intervention techniques.
- 6. Use of theory predictors to tailor intervention techniques to recipients.
- 7. All intervention techniques are linked to theory
- 8. At least one of the intervention techniques is linked to theory
- 9. Group of techniques are linked to a group of constructs/predictors
- 10. All theory-relevant constructs are linked to intervention techniques
- 11. At least one of the theory-relevant constructs is linked to an intervention technique
- Categories of “theory”: 0 = none, 1 = simply CBT, 2 = CBT combination with other, 3 = third wave, 4 = other, 5 = author constructed, 6 = third wave inspired CBI combination.
- Explicit links between constructs and intervention = item 7 OR 8 OR 9





### 3. Modes of delivery

| First author    | Year of publication | Comparison | 1 | 2 | 3 | 4 | 5 | 6 | 7 | 8 | 9 | 10 | 11 |
|-----------------|---------------------|------------|---|---|---|---|---|---|---|---|---|----|----|
| Abbott          | 2009                | Passive    | 1 |   | 1 |   | 1 |   | 1 |   |   | 1  |    |
| Andersson       | 2002                | Passive    | 1 |   |   |   | 1 |   | 1 |   |   | 1  |    |
| Brattberg       | 2006                | Passive    |   | 1 |   | 1 |   | 1 | 1 |   |   |    | 1  |
| Buhrman         | 2004                | Passive    | 1 | 1 | 1 |   | 1 |   | 1 |   | 1 | 1  | 1  |
| Buhrman         | 2011                | Passive    | 1 |   | 1 |   | 1 |   | 1 |   |   | 1  |    |
| Buhrman         | 2015                | Passive    | 1 |   | 1 |   | 1 |   | 1 |   | 1 | 1  |    |
| Buhrman(a)      | 2013                | Passive    | 1 | 1 | 1 |   | 1 |   | 1 |   | 1 | 1  |    |
| Buhrman(b)      | 2013                | Passive    | 1 |   |   |   | 1 |   | 1 |   |   | 1  |    |
| Carpenter       | 2012                | Passive    | 1 | 1 | 1 |   |   |   | 1 |   |   | 1  |    |
| Chiauzzi        | 2010                | Passive    | 1 | 1 | 1 |   |   |   | 1 |   |   | 1  |    |
| Davis           | 2013                | Passive    | 1 | 1 | 1 |   |   |   | 1 |   |   | 1  |    |
| Dear            | 2015                | Passive    | 1 |   | 1 |   | 1 |   | 1 |   | 1 | 1  |    |
| Dear            | 2013                | Passive    | 1 |   | 1 |   | 1 |   | 1 |   | 1 | 1  |    |
| Devenini        | 2005                | Passive    | 1 | 1 |   |   |   |   | 1 |   |   | 1  |    |
| Dowd            | 2015                | Passive    |   | 1 | 1 |   |   |   | 1 |   |   | 1  |    |
| Everitt         | 2013                | Passive    | 1 | 1 |   |   | 1 |   | 1 |   |   | 1  |    |
| Hesser          | 2012                | Passive    | 1 | 1 | 1 |   | 1 |   | 1 |   | 1 |    |    |
| Hunt            | 2015                | Passive    |   |   | 1 |   |   |   | 1 |   |   | 1  |    |
| Hunt            | 2009                | Passive    | 1 |   | 1 |   | 1 |   | 1 |   |   | 1  |    |
| Janse           | 2016                | Passive    | 1 |   |   |   | 1 |   |   |   |   | 1  |    |
| Jasper          | 2014                | Passive    |   |   |   |   | 1 |   | 1 |   |   | 1  |    |
| Krein           | 2013                | Passive    | 1 | 1 | 1 |   |   | 1 | 1 |   |   | 1  |    |
| Lee             | 2014                | Passive    | 1 |   | 1 |   |   |   | 1 | 1 |   |    |    |
| Ljotsson        | 2011                | Passive    | 1 |   | 1 |   | 1 | 1 | 1 |   |   | 1  |    |
| Ljotsson        | 2010                | Passive    | 1 |   | 1 |   | 1 | 1 | 1 |   |   | 1  |    |
| Lorig           | 2008                | Passive    | 1 | 1 | 1 |   | 1 | 1 | 1 |   |   |    |    |
| Menga           | 2014                | Passive    |   | 1 |   |   |   |   | 1 |   |   |    |    |
| Mourad          | 2016                | Passive    | 1 | 1 |   |   | 1 |   | 1 | 1 | 1 | 1  |    |
| Oerlemans       | 2011                | Passive    | 1 |   | 1 |   |   |   |   | 1 |   |    |    |
| Ruehlman        | 2012                | Passive    | 1 | 1 | 1 |   |   | 1 | 1 | 1 |   | 1  |    |
| Schulz          | 2007                | Passive    |   | 1 | 1 | 1 |   | 1 | 1 |   |   |    |    |
| Strom           | 2000                | Passive    | 1 |   | 1 |   |   |   | 1 |   |   | 1  |    |
| Trompetter      | 2015                | Passive    | 1 | 1 |   |   | 1 |   | 1 |   |   | 1  |    |
| Vallejo         | 2015                | Passive    | 1 | 1 | 1 |   | 1 |   | 1 |   |   |    |    |
| Weise           | 2016                | Passive    | 1 | 1 | 1 |   | 1 |   | 1 |   |   | 1  |    |
| Williams        | 2010                | Passive    |   | 1 | 1 |   |   |   | 1 |   | 1 | 1  |    |
| Wilson          | 2015                | Passive    | 1 | 1 | 1 |   |   | 1 | 1 | 1 |   | 1  |    |
| Andersson       | 2003                | Active     |   |   |   |   |   |   |   |   | 1 |    |    |
| Camerini        | 2012                | Active     |   | 1 |   | 1 |   | 1 | 1 |   |   |    |    |
| de Boer         | 2014                | Active     | 1 | 1 | 1 |   | 1 |   | 1 |   | 1 | 1  |    |
| Dear            | 2015                | Active     |   |   |   |   | 1 |   |   |   | 1 |    |    |
| Everitt         | 2013                | Active     |   |   |   |   | 1 |   |   |   |   | 1  |    |
| Hesser          | 2012                | Active     |   | 1 |   |   |   |   |   |   |   |    |    |
| Jasper          | 2014                | Active     |   |   |   |   | 1 |   | 1 |   |   | 1  |    |
| Kaldo           | 2008                | Active     | 1 |   | 1 |   | 1 |   | 1 |   |   | 1  |    |
| Kristjánsdóttir | 2013                | Active     | 1 |   | 1 |   |   |   | 1 | 1 | 1 |    |    |
| Ljotsson        | 2011                | Active     |   |   |   |   |   |   |   |   |   |    |    |
| Moessner        | 2014                | Active     | 1 |   |   |   | 1 | 1 | 1 |   |   |    |    |
| Naylor          | 2008                | Active     | 1 |   |   |   |   |   |   |   | 1 |    |    |
| Riva            | 2014                | Active     |   | 1 |   |   |   |   |   |   |   |    |    |
| Trompetter      | 2015                | Active     |   | 1 |   |   | 1 |   |   |   |   |    |    |
| Vallejo         | 2015                | Active     | 1 | 1 | 1 |   | 1 |   | 1 |   |   |    |    |

Column explanations: 1-11 are the items of the taxonomy. Here mentioned per category:

- Automated Functions: 1. Automated tailored feedback, 2. Enriched information environment, 3. Automated follow-up messages
- Communicative Functions: 4. Access to advisor to request advice, 5. Scheduled contact with advisor, 6. Peer-to-peer access
- Supplementary modes: 7. Internet, 8. Text message (SMS), 9. Telephone, 10. Email, 11. CD-ROM

**Overview of meta-analyses; SMDs, 95% confidence intervals, heterogeneity statistics, forest plots and funnel plots), and sensitivity analyses**

**Comparison 1: Computer-based interventions versus passive controls (tables F-O, figs A-N)**

**Outcome 1.1: Symptom intensity (post)**

Number of eligible studies reporting the outcome: 29

Total number participants: 3284

Table F

|                                                                    | <b>SMD</b> | <b>95% CI</b> | <b>I<sup>2</sup></b> | <b>P</b> |
|--------------------------------------------------------------------|------------|---------------|----------------------|----------|
| All eligible studies (k = 29)                                      | -0.35      | [-.48, -.22]  | 65%                  | <.001    |
| <b>SENSITIVITY ANALYSES</b>                                        |            |               |                      |          |
| <b>Internal validity</b>                                           |            |               |                      |          |
| Low risk selection bias (k = 4)                                    | -0.44      | [-.69, -.20]  | 40%                  | .17      |
| Low risk attrition bias (k = 5)*                                   | -0.57      | [-.93, -.22]  | 71%                  | .009     |
| Low risk reporting bias (k = 6)                                    | -0.31      | [-.61, -.01]  | 80%                  | <.001    |
| Low risk performance bias (k = 9)                                  | -0.45      | [-.65, -.24]  | 50%                  | .04      |
| Low risk due to incomplete data extracted (k = 8)                  | -0.39      | [-.56, -.23]  | 28%                  | .20      |
| Low risk detection bias (k = 27)                                   | -0.34      | [-.47, -.21]  | 65%                  | <.001    |
| Low risk other bias (k = 25)                                       | -0.33      | [-.46, -.20]  | 66%                  | <.001    |
| <b>External validity</b>                                           |            |               |                      |          |
| Participants recruited from a general (open) population (k = 17)   | -0.35      | [-.50, -.21]  | 53%                  | .006     |
| Participants recruited from a clinical (closed) population (k = 7) | -0.33      | [-.68, .02]   | 79%                  | <.001    |

SMD = Standardized mean difference, CI = Confidence interval, P = P-value for a Chi-square test for Tau; a measure of heterogeneity of standardized mean differences

\* Test for subgroup differences (attrition bias): Chi<sup>2</sup> = 1.96, df = 1 (P = 0.16), I<sup>2</sup> = 49.0%

Figure A: Forest plot all studies

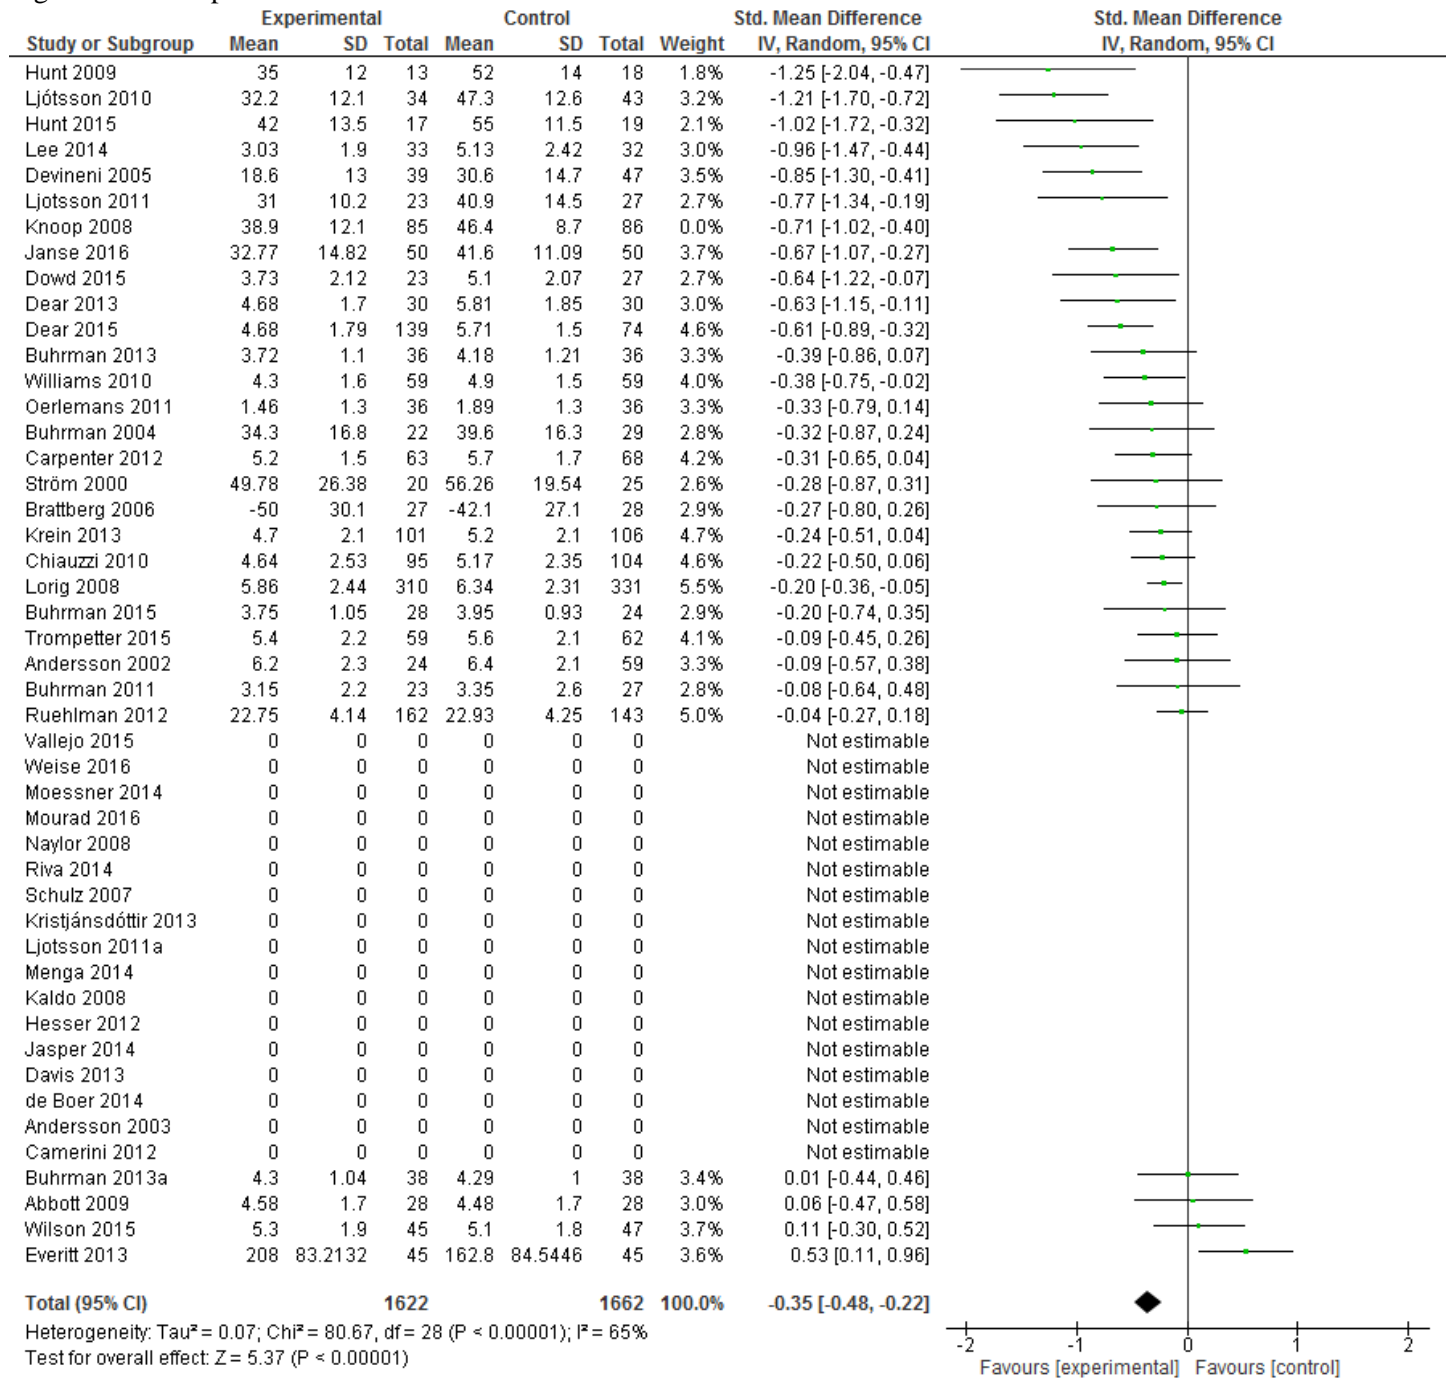

Figure B: Funnel plot all studies

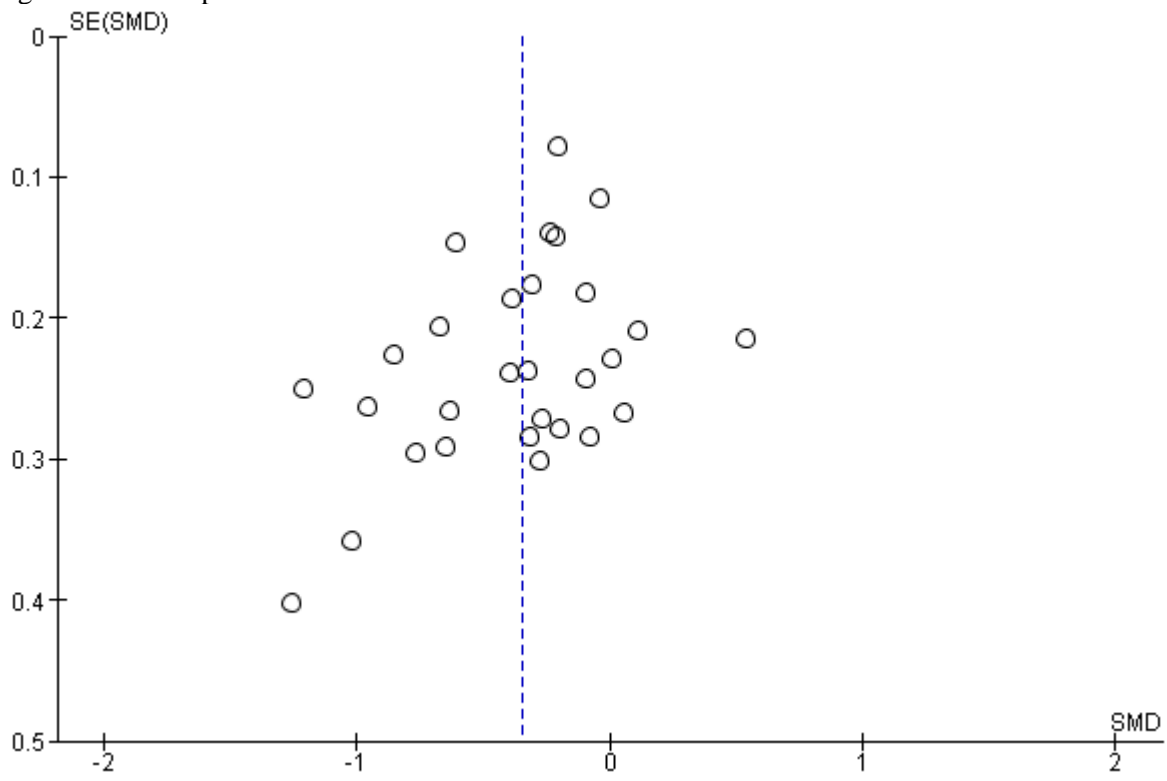



**Outcome 1.2: Health-related Quality Of Life (post)**

Number of eligible studies reporting the outcome: 14

Total number participants: 1408

Table G

|                                                                     | <i>SMD</i> | <b>95% CI</b> | <b>I<sup>2</sup></b> | <b>P</b> |
|---------------------------------------------------------------------|------------|---------------|----------------------|----------|
| All eligible studies (k = 14)                                       | -.36       | [-.58, -.13]  | 70%                  | <.001    |
| <b>SENSITIVITY ANALYSES</b>                                         |            |               |                      |          |
| <b>Internal validity</b>                                            |            |               |                      |          |
| Low risk selection bias (k = 3)                                     | -.50       | [-.86, -.13]  | 27%                  | .25      |
| Low risk attrition bias (k = 3)                                     | -.38       | [-.97, .21]   | 75%                  | .02      |
| Low risk reporting bias (k = 1)                                     | .14        | [-.27, .56]   | /                    | /        |
| Low risk performance bias (k = 3)                                   | -.51       | [-.99, -.03]  | 62%                  | .07      |
| Low risk due to incomplete data extracted (k = 3)                   | -.31       | [-.59, -.03]  | 0%                   | .38      |
| Low risk detection bias                                             |            |               |                      |          |
| Low risk other bias (k = 12)                                        | -.25       | [-.46, -.05]  | 62%                  | .002     |
| <b>External validity</b>                                            |            |               |                      |          |
| Participants recruited from a general (open) population (k = 8)*    | -.49       | [-.75, -.23]  | 61%                  | .01      |
| Participants recruited from a clinical (closed) population (k = 4)* | .02        | [-.45, .48]   | 70%                  | .02      |

*SMD* = Standardized mean difference, *CI* = Confidence interval, *P* = P-value for a Chi-square test for Tau; a measure of heterogeneity of standardized mean differences

\* Test for subgroup differences:  $\text{Chi}^2 = 2.75$ ,  $\text{df} = 1$  ( $P = 0.10$ ),  $I^2 = 63.7\%$

Figure C: Forest plot all studies

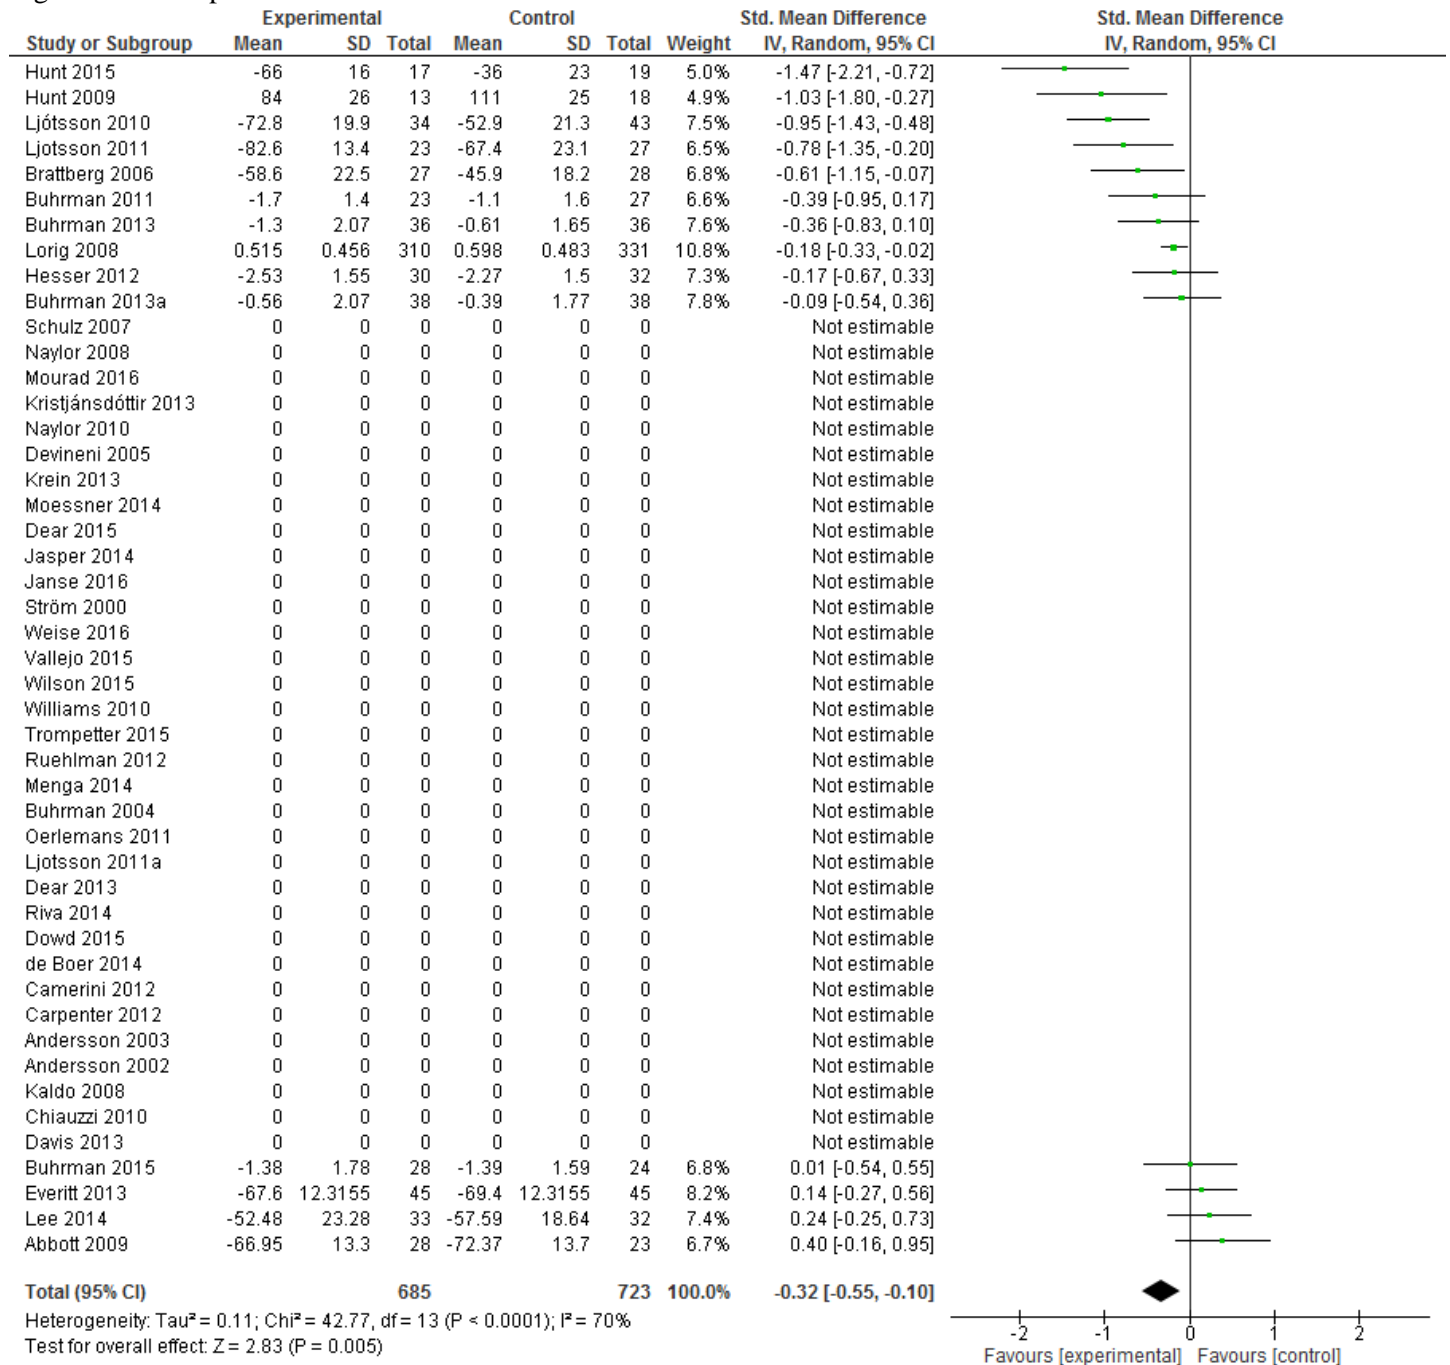

Figure D: Funnel plot all studies

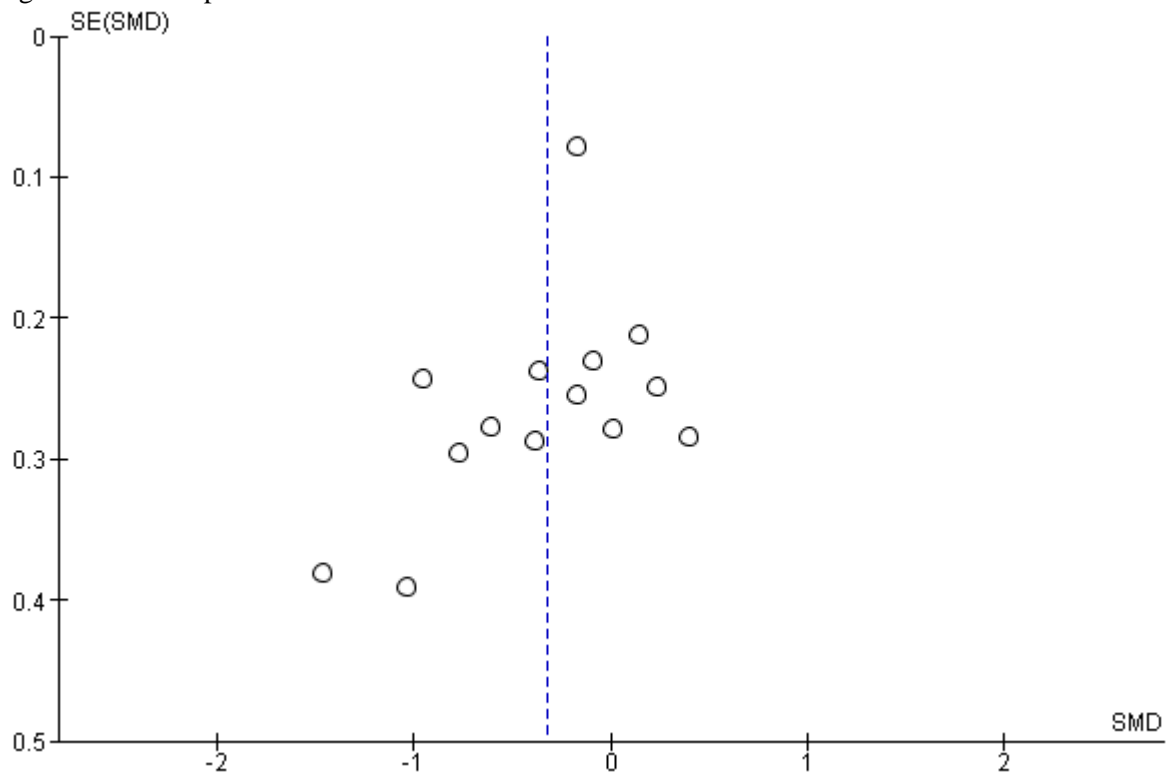

### Outcome 1.3: Functional interference (post)

Number of eligible studies reporting the outcome: 30

Total number participants: 3387

Table H

|                                                                    | <i>SMD</i> | <b>95% CI</b> | <b>I<sup>2</sup></b> | <b>P</b> |
|--------------------------------------------------------------------|------------|---------------|----------------------|----------|
| All eligible studies (k = 30)                                      | -0.35      | [-.45, -.25]  | 45%                  | .004     |
| <b>SENSITIVITY ANALYSES</b>                                        |            |               |                      |          |
| <b>Internal validity</b>                                           |            |               |                      |          |
| Low risk selection bias (k = 4)                                    | -0.43      | [-.61, -.25]  | 3%                   | .38      |
| Low risk attrition bias (k = 8)*                                   | -0.53      | [-.68, -.39]  | 0%                   | .44      |
| Low risk reporting bias (k = 7)                                    | -0.50      | [-.71, -.28]  | 66%                  | .007     |
| Low risk performance bias (k = 12)                                 | -0.49      | [-.61, -.36]  | 0%                   | .46      |
| Low risk due to incomplete data extracted (k = 11)                 | -0.48      | [-.63, -.32]  | 40%                  | .08      |
| Low risk detection bias                                            |            |               |                      |          |
| Low risk other bias (k = 27)                                       | -0.35      | [-.46, -.25]  | 48%                  | .004     |
| <b>External validity</b>                                           |            |               |                      |          |
| Participants recruited from a general (open) population (k = 18)   | -0.42      | [-.56, -.28]  | 56%                  | .002     |
| Participants recruited from a clinical (closed) population (k = 8) | -0.28      | [-.46, -.09]  | 26%                  | .22      |

*SMD* = Standardized mean difference, *CI* = Confidence interval, *P* = P-value for a Chi-square test for Tau; a measure of heterogeneity of standardized mean differences

\* Test for subgroup differences: attrition bias  $\text{Chi}^2 = 7.97$ ,  $\text{df} = 1$  ( $P = 0.005$ ),  $I^2 = 87.5\%$ , performance bias  $\text{Chi}^2 = 5.10$ ,  $\text{df} = 1$  ( $P = 0.02$ ),  $I^2 = 80.4\%$

Figure E: Forest plot

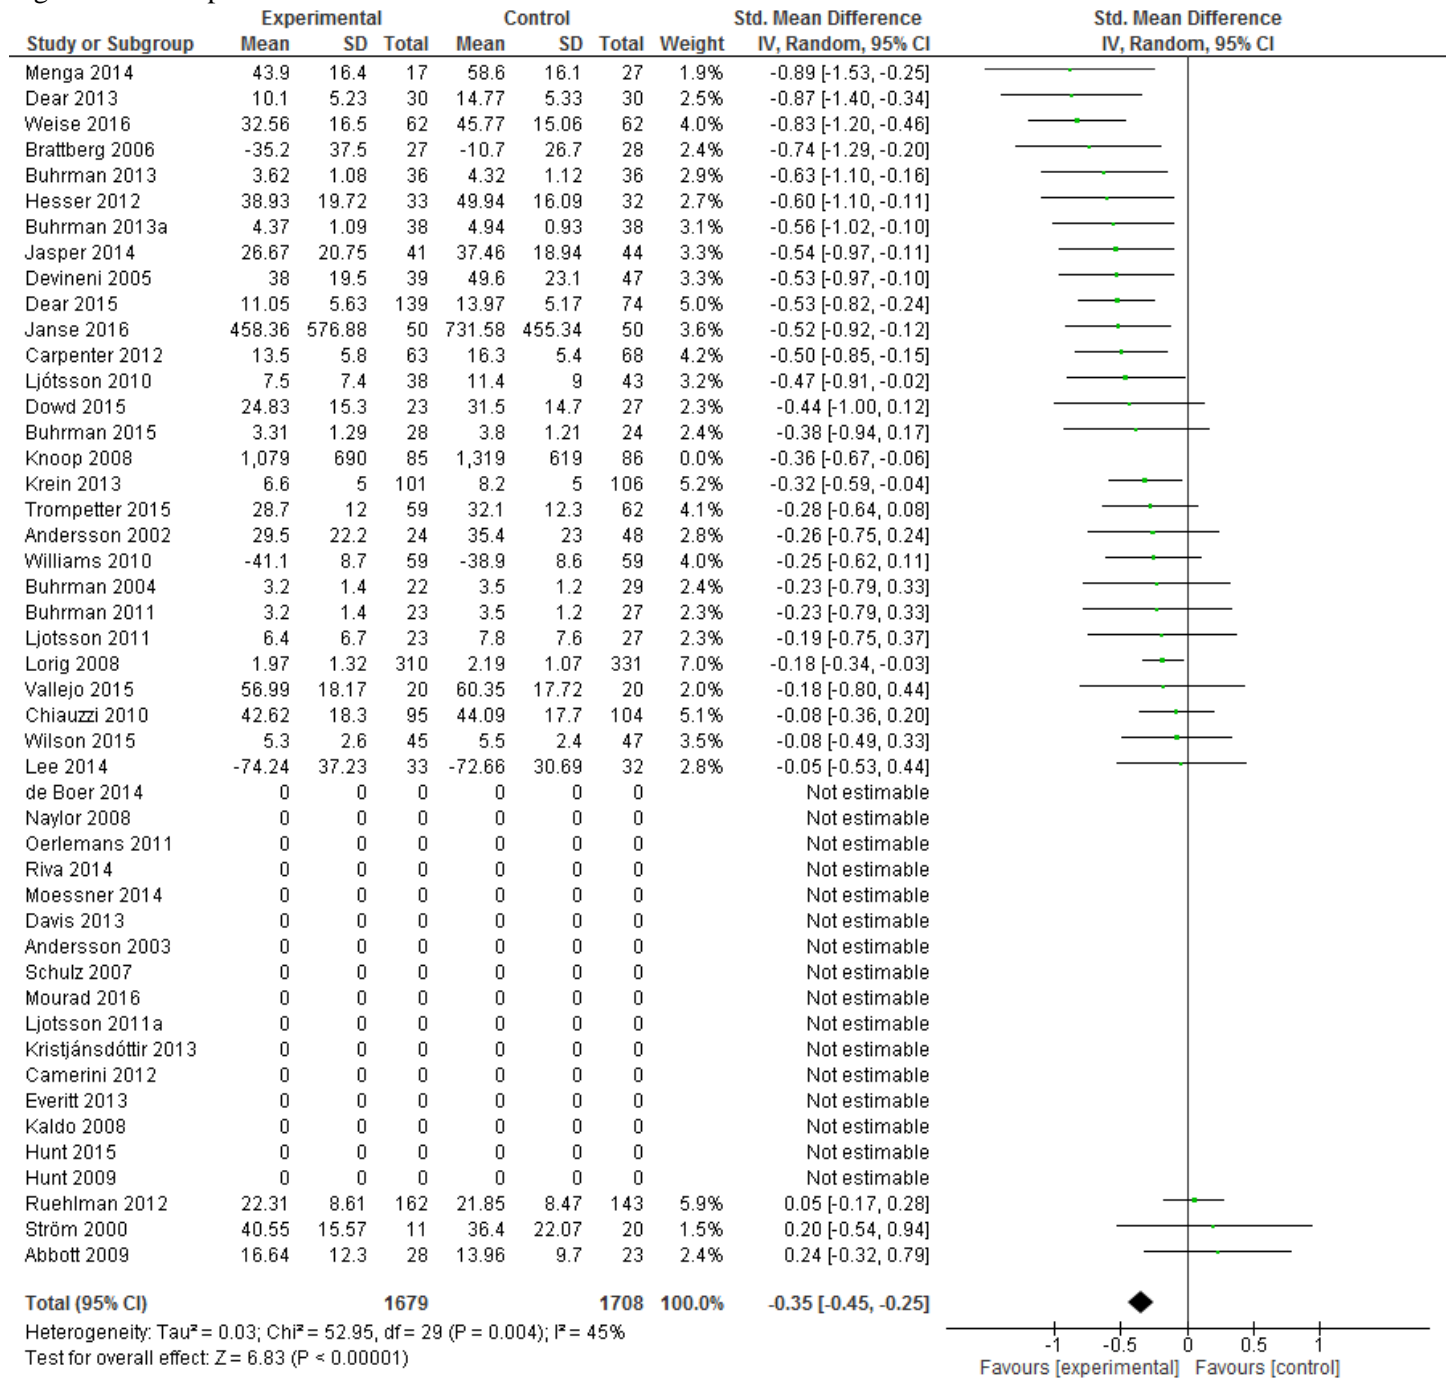

Figure F: Funnel plot all studies

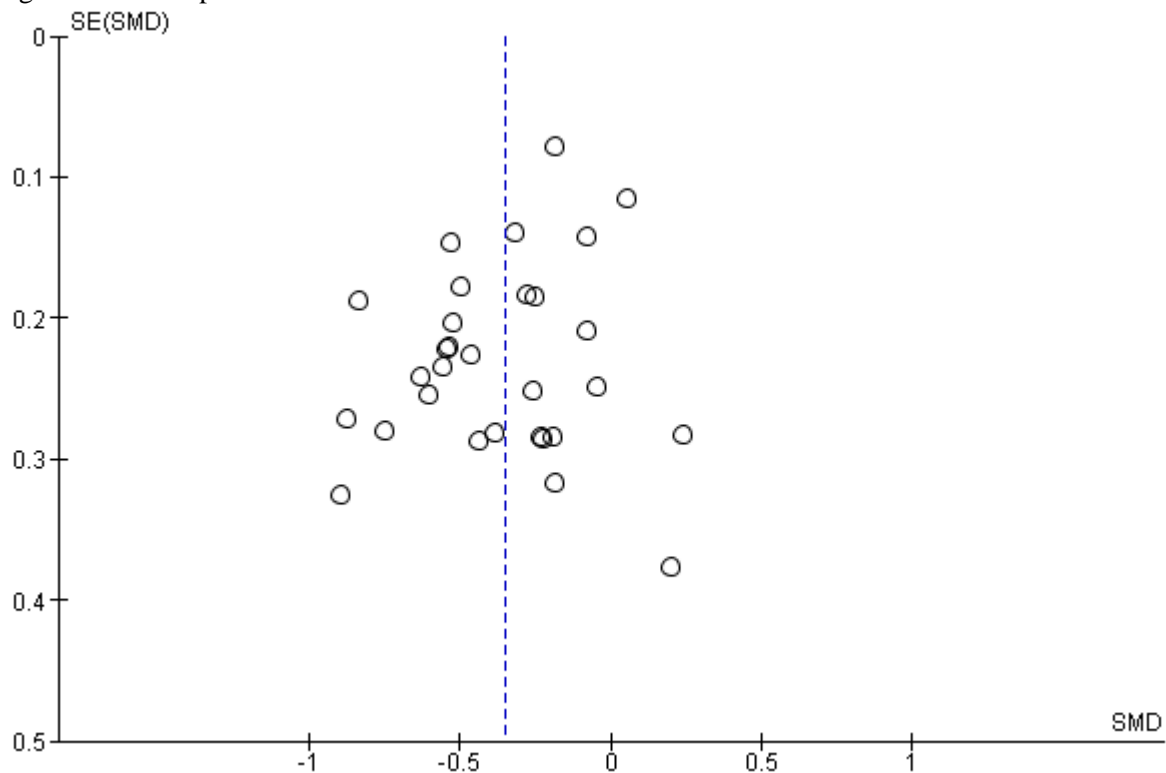

## Outcome 1.4: Catastrophizing (post)

Number of eligible studies reporting the outcome: 24

Total number participants: 2900

Table I

|                                                                    | <i>SMD</i> | <b>95% CI</b> | <b>I<sup>2</sup></b> | <b>P</b> |
|--------------------------------------------------------------------|------------|---------------|----------------------|----------|
| All eligible studies (k = 24)                                      | -.41       | [-.50, -.31]  | 28%                  | .1       |
| <b>SENSITIVITY ANALYSES</b>                                        |            |               |                      |          |
| <b>Internal validity</b>                                           |            |               |                      |          |
| Low risk selection bias (k = 4)                                    | -.34       | [-.59, -.1]   | 41%                  | .17      |
| Low risk attrition bias (k = 7)                                    | -.54       | [-.77, -.31]  | 51%                  | .06      |
| Low risk reporting bias (k = 6)                                    | -.43       | [-.59, -.26]  | 37%                  | .16      |
| Low risk performance bias (k = 11)                                 | -.5        | [-.63, -.37]  | 0%                   | .46      |
| Low risk due to incomplete data extracted (k = 10)                 | -.49       | [-.62, -.35]  | 7%                   | .38      |
| Low risk detection bias                                            |            |               |                      |          |
| Low risk other bias (k = 21)                                       | -.4        | [-.5, -.3]    | 31%                  | .09      |
| <b>External validity</b>                                           |            |               |                      |          |
| Participants recruited from a general (open) population (k = 16)   | -.44       | [-.56, -.32]  | 34%                  | .09      |
| Participants recruited from a clinical (closed) population (k = 3) | -.16       | [-.39, .07]   | 0%                   | .93      |

*SMD* = Standardized mean difference, *CI* = Confidence interval, *P* = P-value for a Chi-square test for Tau; a measure of heterogeneity of standardized mean differences

Figure G: Forest plot all studies

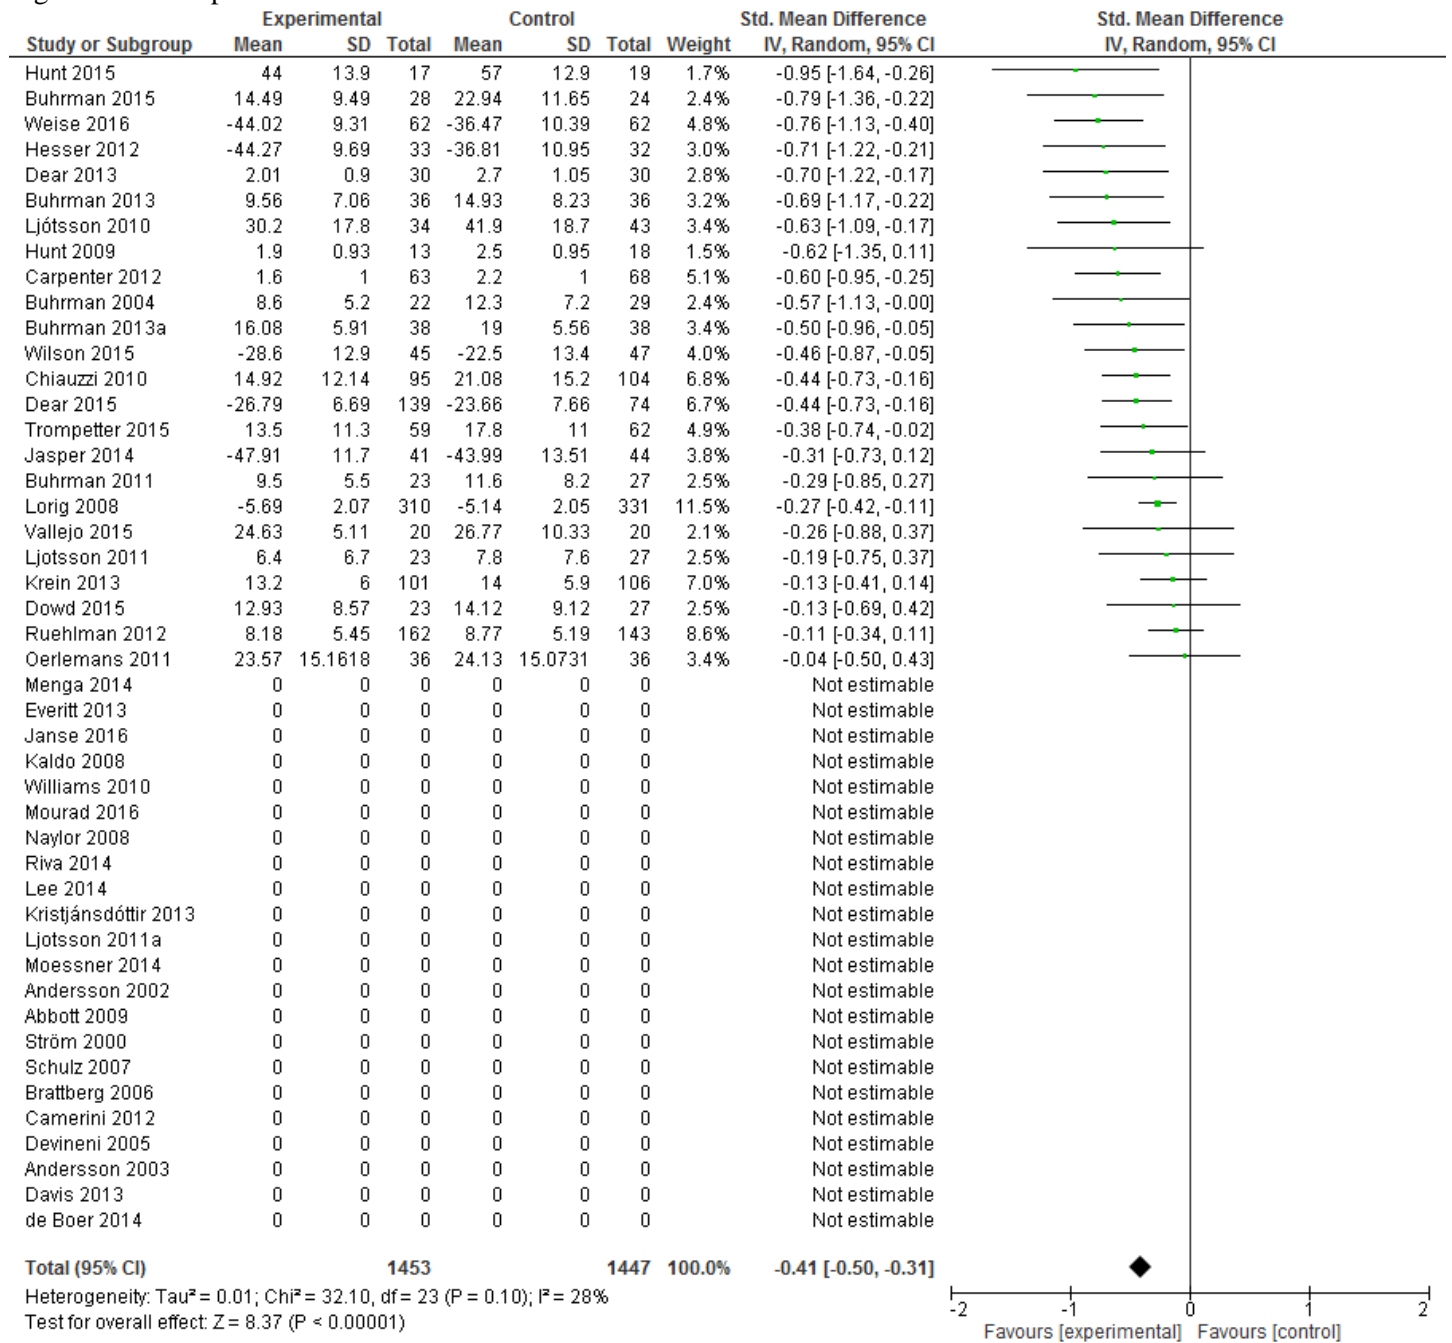



Figure H: Funnel plot all studies

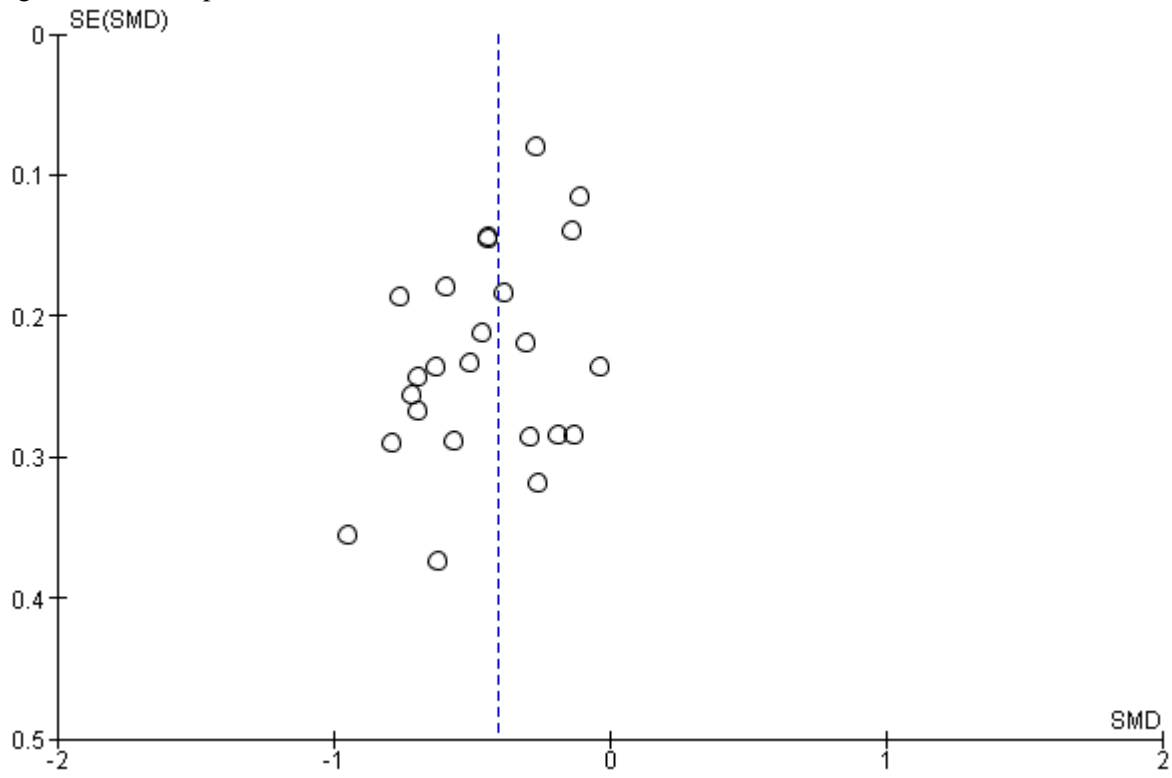

**Outcome 1.5: Depression (post)**

Number of eligible studies reporting the outcome: 24

Total number participants: 2221

Table J

|                                                                     | <i>SMD</i> | <b>95% CI</b> | <b>I<sup>2</sup></b> | <b>P</b> |
|---------------------------------------------------------------------|------------|---------------|----------------------|----------|
| All eligible studies (k = 24)                                       | -.18       | [-.28, -.07]  | 29%                  | .1       |
| <b>SENSITIVITY ANALYSES</b>                                         |            |               |                      |          |
| <b>Internal validity</b>                                            |            |               |                      |          |
| Low risk selection bias (k = 3)                                     | -.25       | [-.65, .14]   | 61%                  | .08      |
| Low risk attrition bias (k = 8)*                                    | -.42       | [-.59, -.26]  | 0%                   | .95      |
| Low risk reporting bias (k = 8)                                     | -.24       | [-.45, -.02]  | 51%                  | .04      |
| Low risk performance bias (k = 11)                                  | -.22       | [-.35, -.08]  | 3%                   | .41      |
| Low risk due to incomplete data extracted (k = 10)                  | -.25       | [-.4, -.11]   | 31%                  | .16      |
| Low risk detection bias                                             |            |               |                      |          |
| Low risk other bias (k = 21)                                        | -.18       | [-.29, -.07]  | 38%                  | .04      |
| <b>External validity</b>                                            |            |               |                      |          |
| Participants recruited from a general (open) population (k = 15)*   | -.2        | [-.32, -.08]  | 20%                  | .23      |
| Participants recruited from a clinical (closed) population (k = 5)* | -.03       | [-.4, .35]    | 65%                  | .02      |

*SMD* = Standardized mean difference, *CI* = Confidence interval, *P* = P-value for a Chi-square test for Tau; a measure of heterogeneity of standardized mean differences

\* Test for subgroup differences: attrition bias (low vs. unclear or high risk)  $\chi^2 = 13.27$ ,  $df = 1$  ( $P = 0.0003$ ),  $I^2 = 92.5\%$ ; open vs. closed Test for subgroup differences:  $\chi^2 = 0.76$ ,  $df = 1$  ( $P = 0.38$ ),  $I^2 = 0\%$ .

Figure I: Forest plot

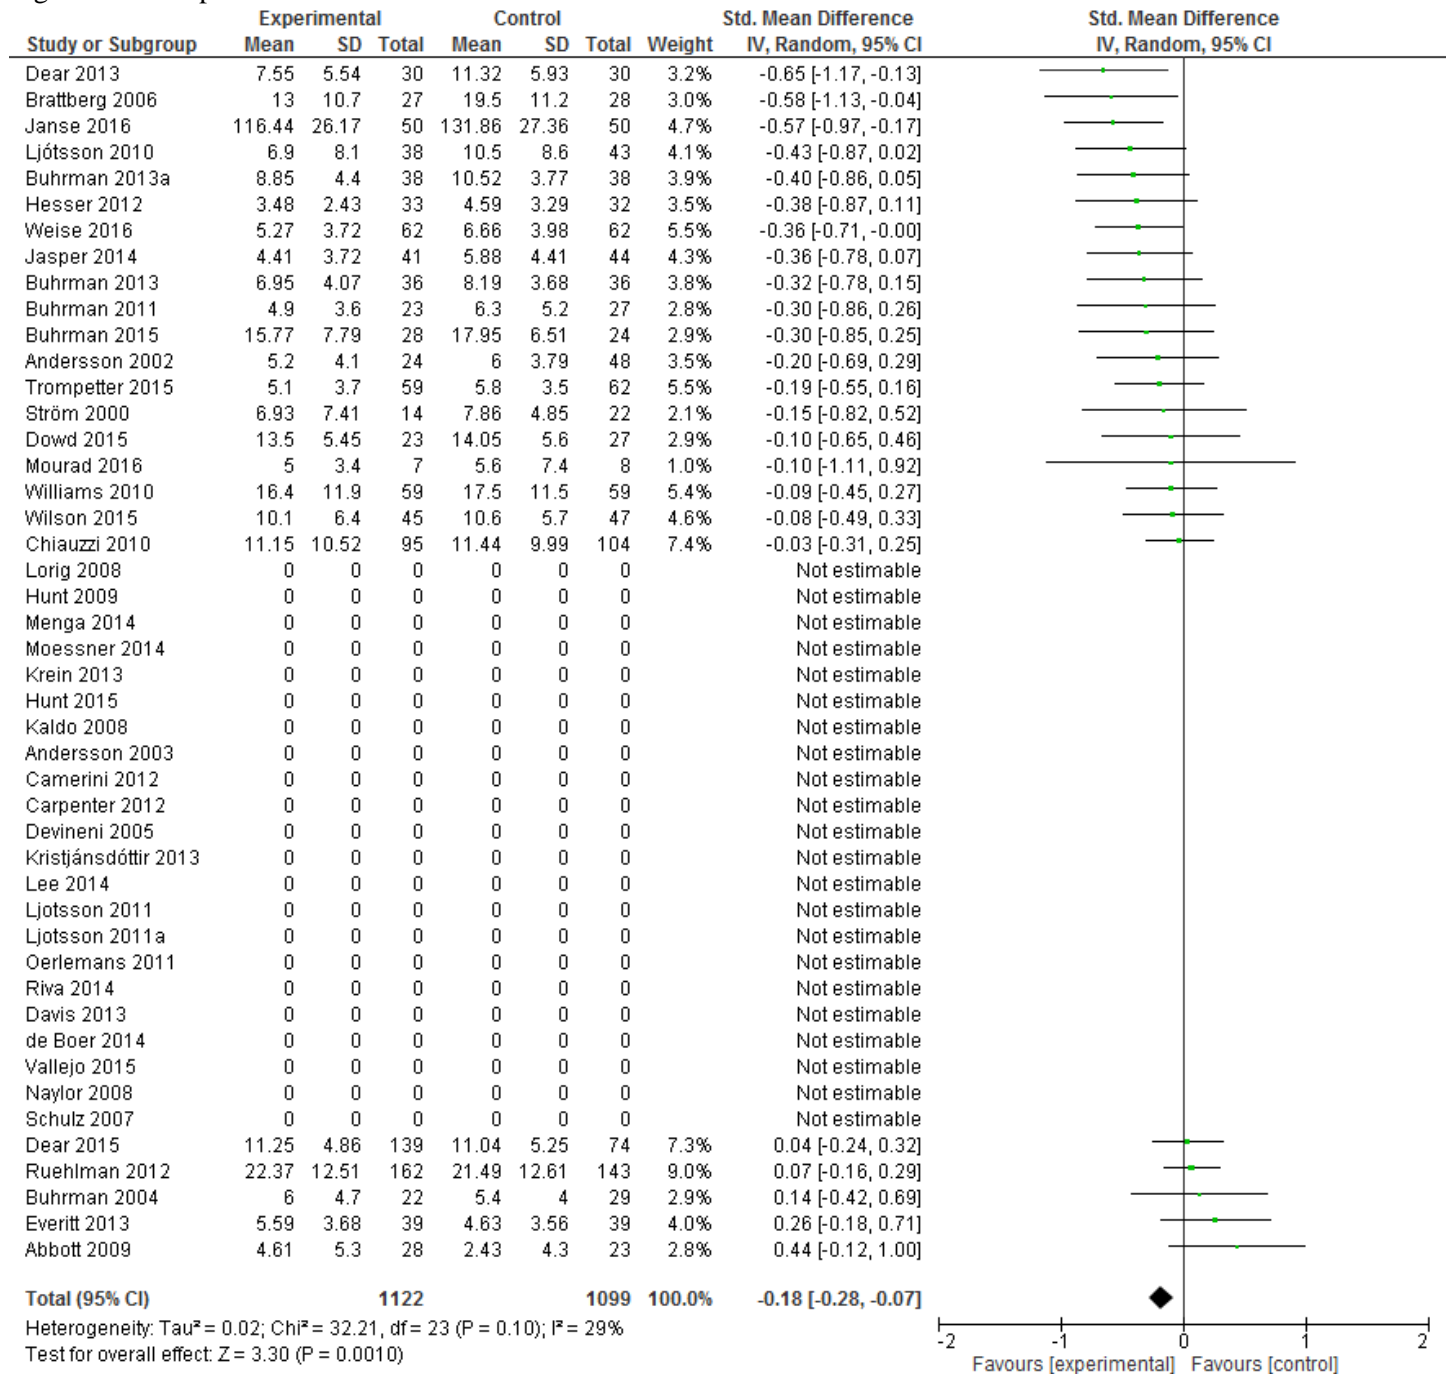

Figure J: Funnel plot all studies

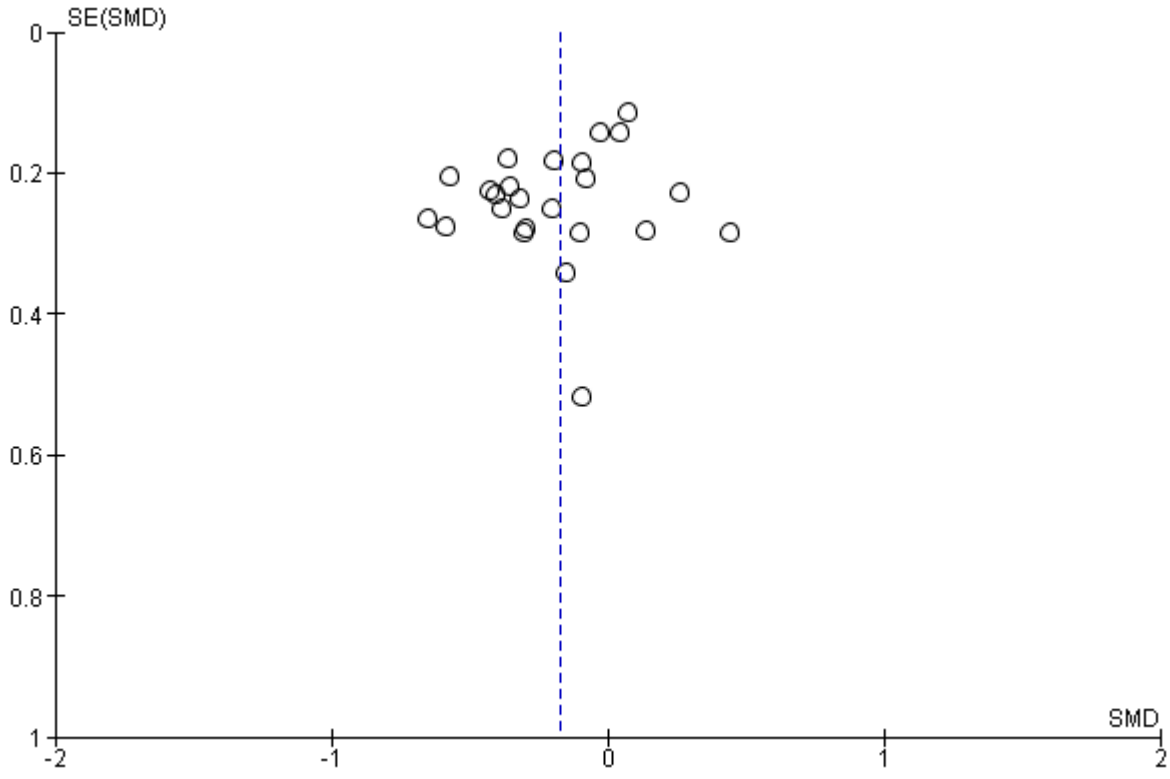

### Outcome 1.6: Symptom intensity (6 or more months at follow-up)

Number of eligible studies reporting the outcome: 4

Total number participants: 1015

Table K

|                              | <i>SMD</i> | 95% CI       | <i>I</i> <sup>2</sup> | <i>P</i> |
|------------------------------|------------|--------------|-----------------------|----------|
| All eligible studies (k = 4) | -.18       | [-.30, -.05] | 0%                    | .52      |

*SMD* = Standardized mean difference, *CI* = Confidence interval, *P* = P-value for a Chi-square test for Tau; a measure of heterogeneity of standardized mean differences

Figure K: Forest plot all studies

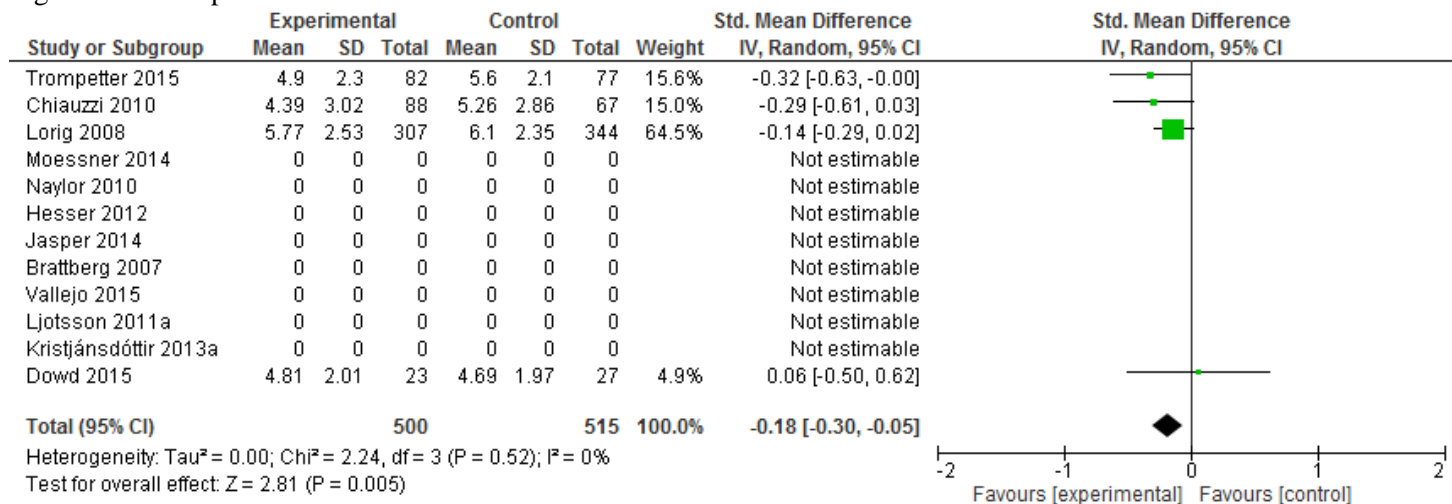

**Outcome 1.7 HRQOL (6 or more months at follow-up)**

Number of eligible studies reporting the outcome: 1

Total number participants: 651

Table L

|                                          | <i>SMD</i> | <b>95% CI</b> | <b>I<sup>2</sup></b> | <i>P</i> |
|------------------------------------------|------------|---------------|----------------------|----------|
| All eligible studies (k = 1; Lorig 2008) | .13        | [-.02, -.28]  | /                    | /        |

*SMD* = Standardized mean difference, *CI* = Confidence interval, *P* = P-value for a Chi-square test for Tau; a measure of heterogeneity of standardized mean differences

### Outcome 1.8 Functional interference (6 or more months at follow-up)

Number of eligible studies reporting the outcome: 4

Total number participants: 1015

Table M

|                              | <i>SMD</i> | 95% CI       | <i>I</i> <sup>2</sup> | <i>P</i> |
|------------------------------|------------|--------------|-----------------------|----------|
| All eligible studies (k = 4) | -.19       | [-.31, -.06] | 0%                    | .55      |

*SMD* = Standardized mean difference, *CI* = Confidence interval, *P* = P-value for a Chi-square test for Tau; a measure of heterogeneity of standardized mean differences

Figure L: Forrest plot all studies

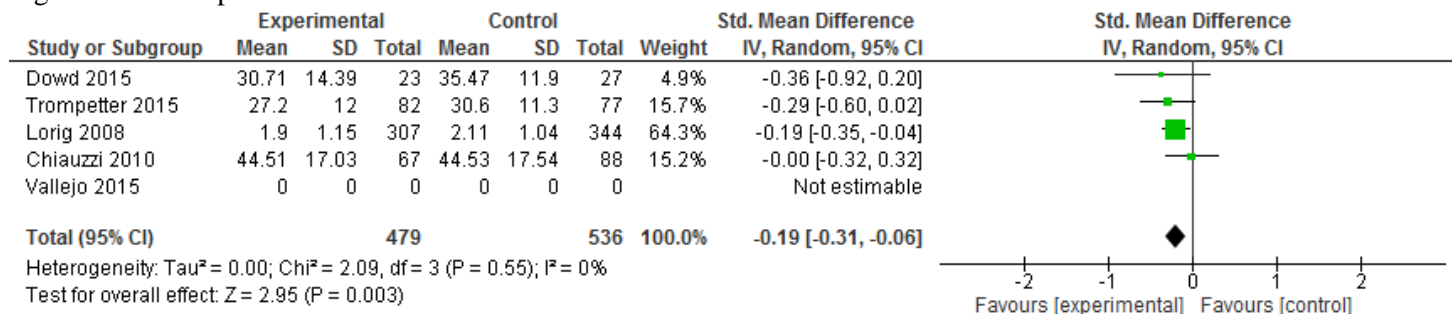

### Outcome 1.9 Catastrophizing (6 or more months at follow-up)

Number of eligible studies reporting the outcome: 4

Total number participants: 1015

Table N

|                              | <i>SMD</i> | <b>95% CI</b> | <b>I<sup>2</sup></b> | <b>P</b> |
|------------------------------|------------|---------------|----------------------|----------|
| All eligible studies (k = 4) | -.32       | [-.47, -.17]  | 19%                  | .30      |

*SMD* = Standardized mean difference, *CI* = Confidence interval, *P* = P-value for a Chi-square test for Tau; a measure of heterogeneity of standardized mean differences

Figure M: Forrest plot all studies

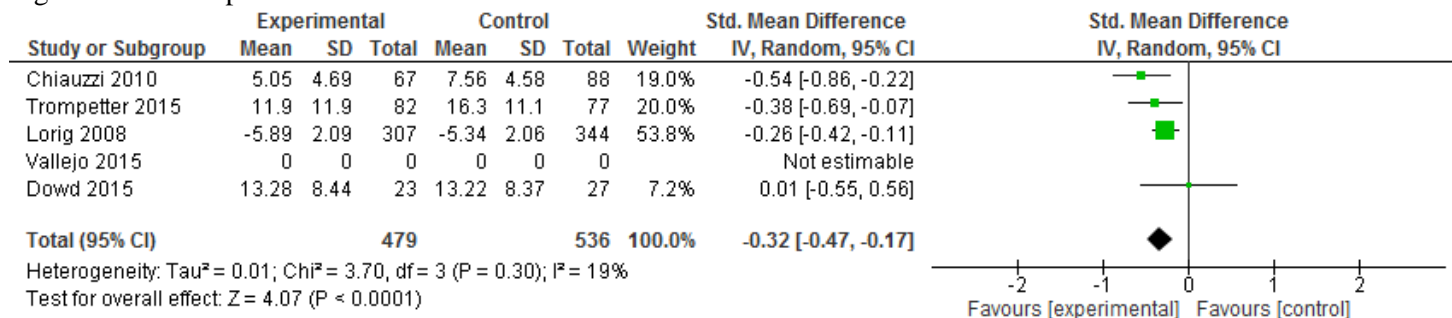



### Outcome 1.10: Depression (6 or more months at follow-up)

Number of eligible studies reporting the outcome: 4

Total number participants: 416

Table O

|                              | <i>SMD</i> | <b>95% CI</b> | <b>I<sup>2</sup></b> | <b>P</b> |
|------------------------------|------------|---------------|----------------------|----------|
| All eligible studies (k = 4) | -.29       | [-.48, -.10]  | 0%                   | .59      |

*SMD* = Standardized mean difference, *CI* = Confidence interval, *P* = P-value for a Chi-square test for Tau; a measure of heterogeneity of standardized mean differences

Figure N: Forrest plot all studies

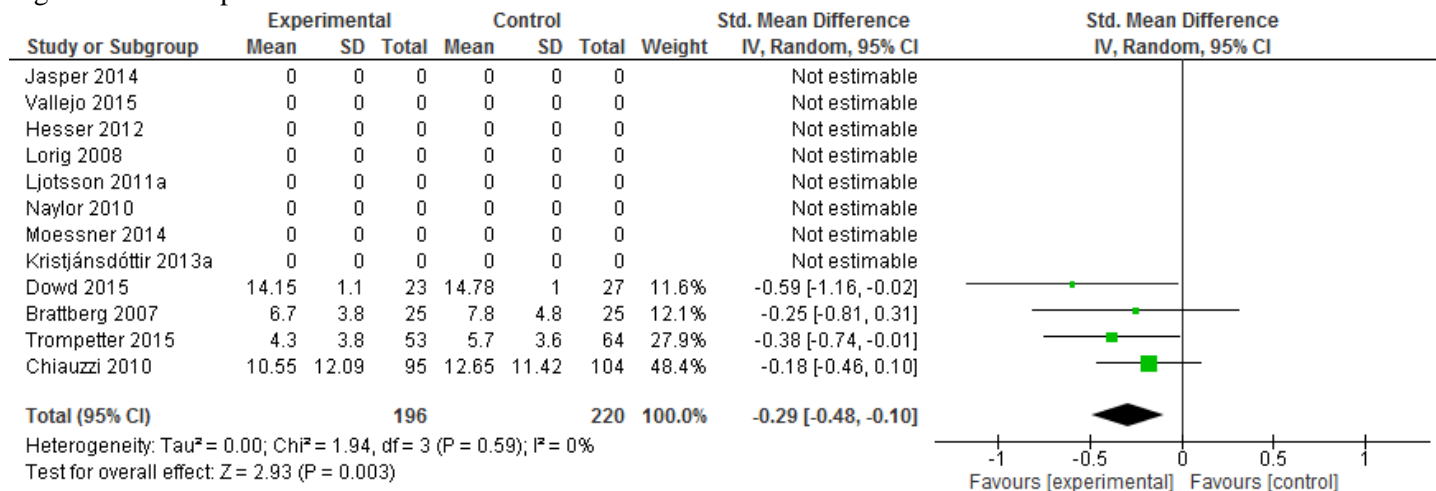

**Comparison 2: Computer based versus active control (tables P-Y, and figs O-AB)**

**Outcome 2.1: Symptom intensity (post)**

Number of eligible studies reporting the outcome: 11

Total number participants: 1292

Table P

|                                                                    | <i>SMD</i> | <b>95% CI</b> | <b>I<sup>2</sup></b> | <b>P</b> |
|--------------------------------------------------------------------|------------|---------------|----------------------|----------|
| All eligible studies (k = 11)                                      | -.16       | [-.35, .02]   | 56%                  | .01      |
| <b>SENSITIVITY ANALYSES</b>                                        |            |               |                      |          |
| <b>Internal validity</b>                                           |            |               |                      |          |
| Low risk selection bias (k = 4)* <sup>1</sup>                      | -.33       | [-.66, .01]   | 71%                  | .002     |
| Low risk attrition bias (k = 5)                                    | -.2        | [-.61, .2]    | 73%                  | .005     |
| Low risk reporting bias (k = 3)                                    | -.26       | [-.44, -.07]  | 0%                   | .38      |
| Low risk performance bias (k = 5)                                  | -.29       | [-.63, .04]   | 60%                  | .04      |
| Low risk due to incomplete data extracted (k = 2)                  | -.60       | [-1.3, 0.1]   | 80%                  | .03      |
| Low risk detection bias                                            |            |               |                      |          |
| Low risk other bias (k = 8)                                        | -.18       | [-.39, .04]   | 68%                  | .003     |
| <b>External validity</b>                                           |            |               |                      |          |
| Participants recruited from a general (open) population (k = 3)    | -.31       | [-.51, -.12]  | 0%                   | .92      |
| Participants recruited from a clinical (closed) population (k = 5) | -.08       | [-.44, .28]   | 70%                  | .01      |

*SMD* = Standardized mean difference, *CI* = Confidence interval, *P* = P-value for a Chi-square test for Tau; a measure of heterogeneity of standardized mean differences

\*<sup>1</sup> 1 study had risk of bias due to dissimilarity at baseline for symptom intensity (Naylor 2008)

Figure O: Forest plot all studies

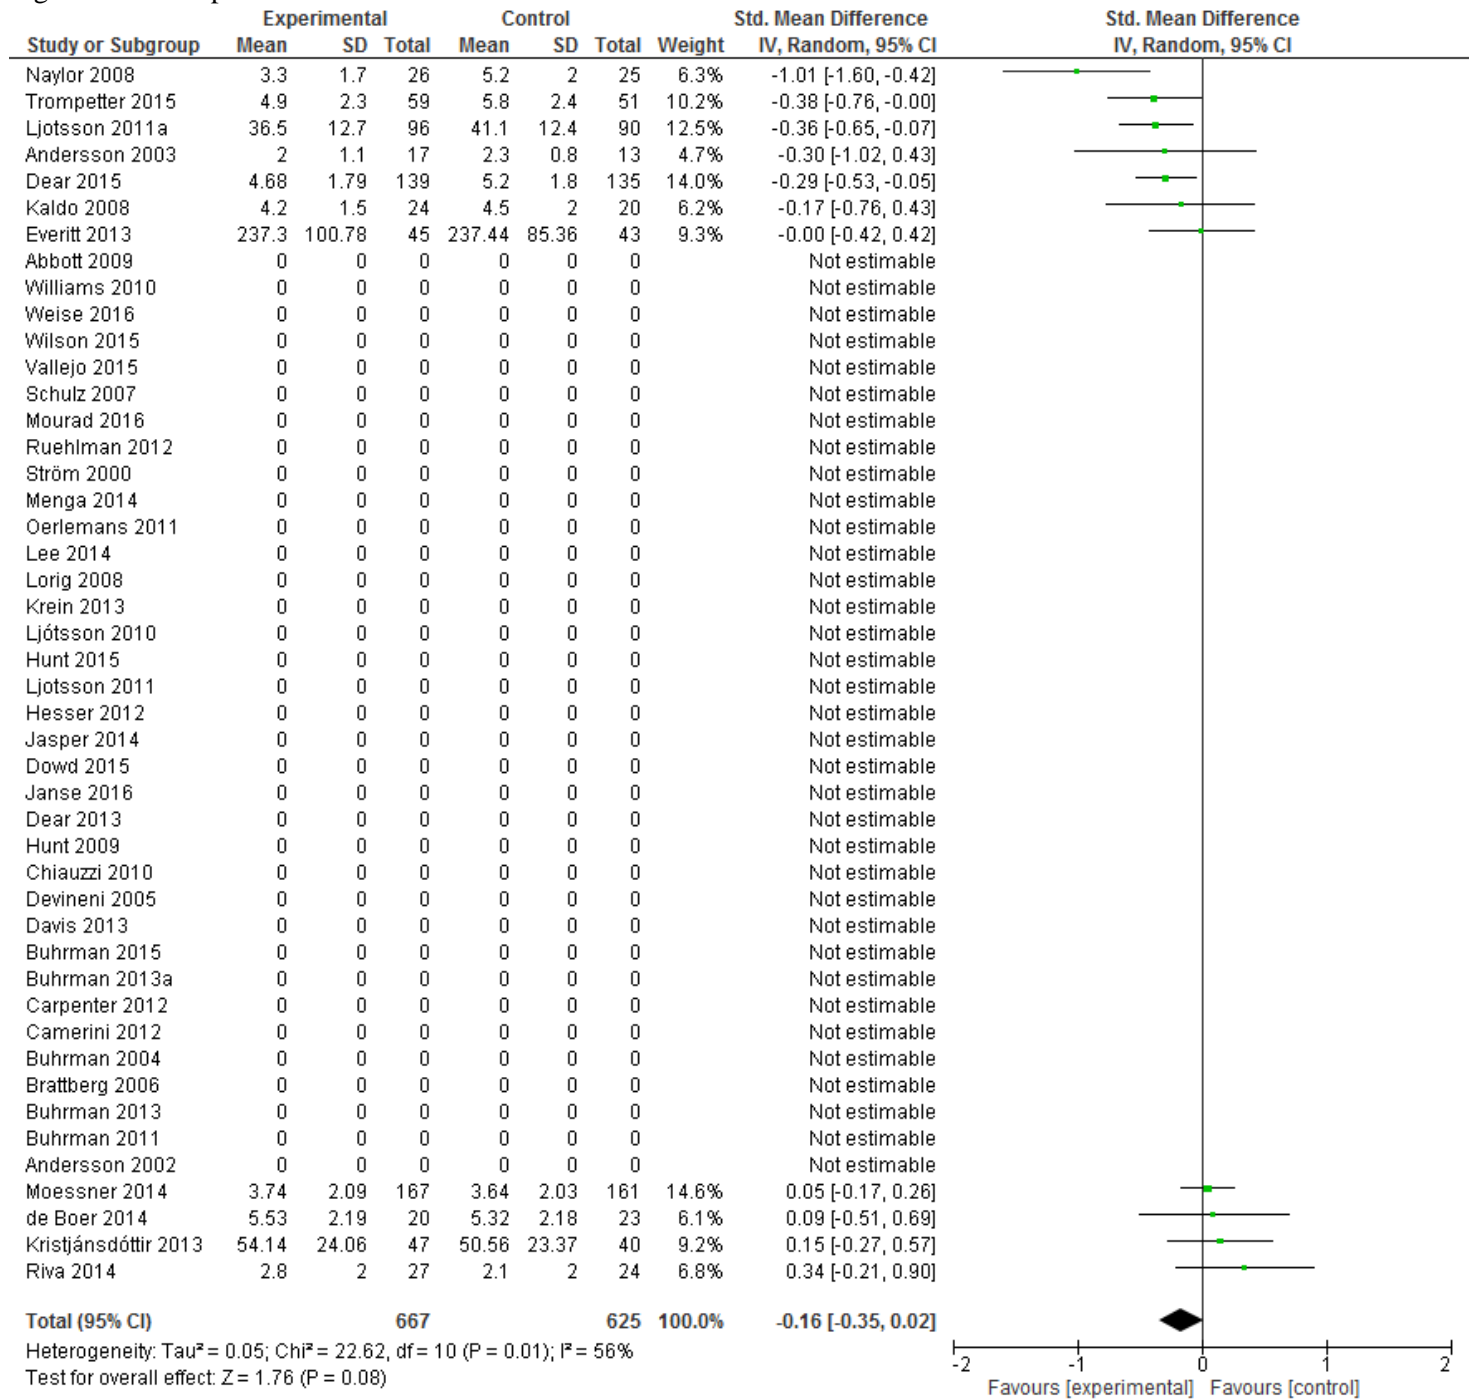

Figure P: Funnel plot

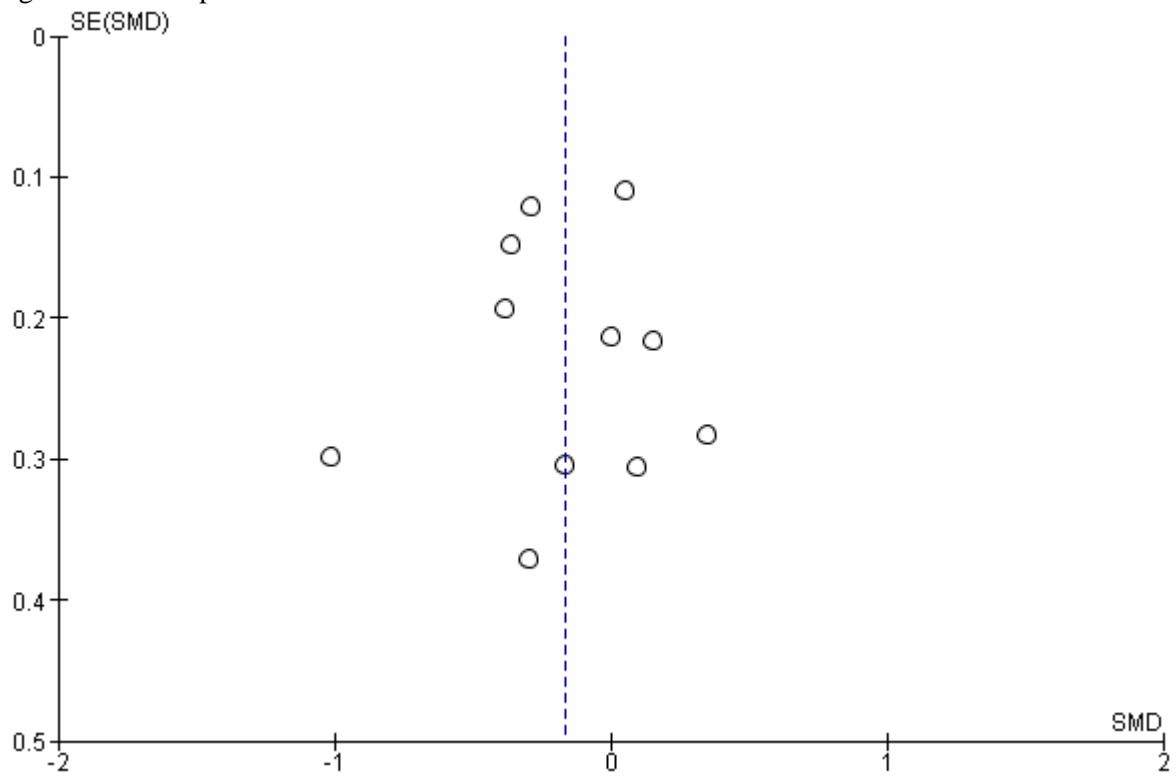

**Outcome 2.2: Health-related Quality Of Life (post)**

Number of eligible studies reporting the outcome: 6

Total number participants: 761

Table Q

|                                                                    | <i>SMD</i> | <b>95% CI</b> | <b>I<sup>2</sup></b> | <b>P</b> |
|--------------------------------------------------------------------|------------|---------------|----------------------|----------|
| All eligible studies (k = 6)                                       | -.17       | [-.48, .14]   | 74%                  | .002     |
| <b>SENSITIVITY ANALYSES</b>                                        |            |               |                      |          |
| <b>Internal validity</b>                                           |            |               |                      |          |
| Low risk selection bias (k = 3)                                    | -.34       | [-.89, .21]   | 78%                  | .01      |
| Low risk attrition bias (k = 3)                                    | -.34       | [-.89, .21]   | 78%                  | .01      |
| Low risk reporting bias (k = 1)                                    | /          | /             | /                    | /        |
| Low risk performance bias (k = 2)                                  | -.24       | [-1.27, .78]  | 86%                  | .007     |
| Low risk due to incomplete data extracted (k = 1)                  | /          | /             | /                    | /        |
| Low risk detection bias                                            |            |               |                      |          |
| Low risk other bias (k = 5)                                        | -.15       | [-.50, .21]   | 79%                  | <.001    |
| <b>External validity</b>                                           |            |               |                      |          |
| Participants recruited from a general (open) population (k = 1)    | /          | /             | /                    | /        |
| Participants recruited from a clinical (closed) population (k = 3) | -.17       | [-.55, .22]   | 69%                  | .02      |

*SMD* = Standardized mean difference, *CI* = Confidence interval, *P* = P-value for a Chi-square test for Tau; a measure of heterogeneity of standardized mean differences

Figure Q: Forest plot all studies

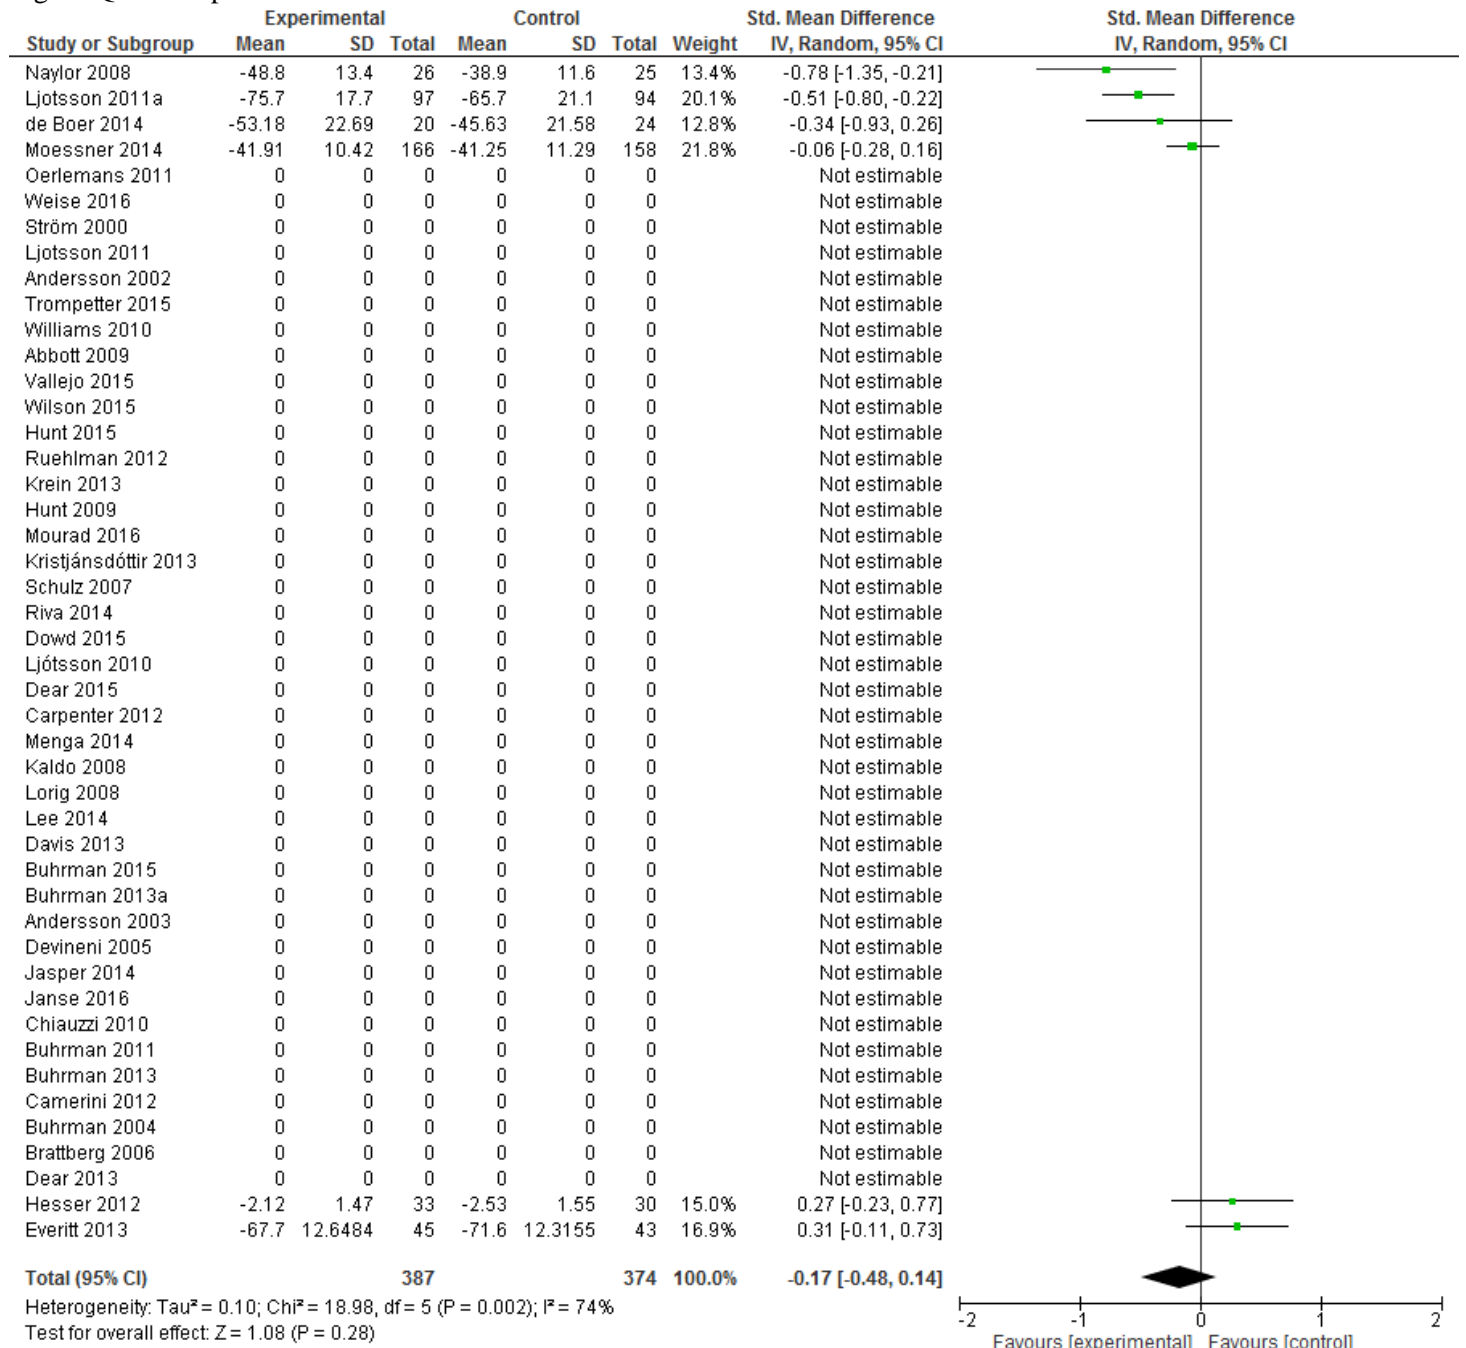

Figure R: Funnel plot

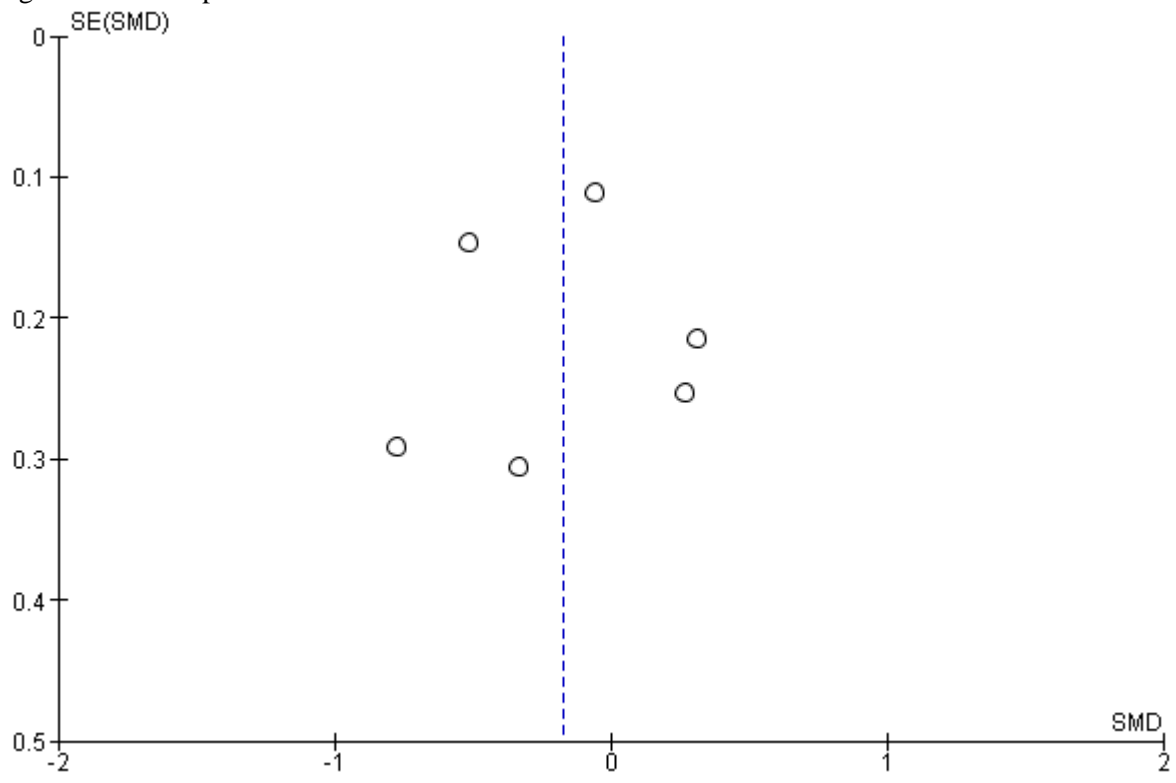

### Outcome 2.3: Functional interference (post)

Number of eligible studies reporting the outcome: 10

Total number participants: 1097

Table R

|                                                                    | <i>SMD</i> | <b>95% CI</b> | <b>I<sup>2</sup></b> | <b>P<sup>1</sup></b> |
|--------------------------------------------------------------------|------------|---------------|----------------------|----------------------|
| All eligible studies (k = 10)                                      | -.15       | [-.27, -.03]  | 0%                   | .7                   |
| <b>SENSITIVITY ANALYSES</b>                                        |            |               |                      |                      |
| <b>Internal validity</b>                                           |            |               |                      |                      |
| Low risk selection bias (k = 4)                                    | -.17       | [-.35, .02]   | 0%                   | .52                  |
| Low risk attrition bias (k = 4)                                    | -.21       | [-.46, .04]   | 0%                   | .62                  |
| Low risk reporting bias (k = 3)                                    | -.15       | [-.37, .08]   | 0%                   | .60                  |
| Low risk performance bias (k = 8)                                  | -.13       | [-.28, .03]   | 0%                   | .87                  |
| Low risk due to incomplete data extracted (k = 4)                  | -.09       | [-.28, .09]   | 0%                   | .75                  |
| Low risk detection bias                                            |            |               |                      |                      |
| Low risk other bias (k = 7)                                        | -.16       | [-.29, -.04]  | 0%                   | .47                  |
| <b>External validity</b>                                           |            |               |                      |                      |
| Participants recruited from a general (open) population (k = 5)    | -.18       | [-.38, .02]   | 20%                  | .29                  |
| Participants recruited from a clinical (closed) population (k = 3) | -.1        | [-.29, .08]   | 0%                   | .68                  |

*SMD* = Standardized mean difference, *CI* = Confidence interval, *P* = P-value for a Chi-square test for Tau; a measure of heterogeneity of standardized mean differences



**Figure S: Forest plot**

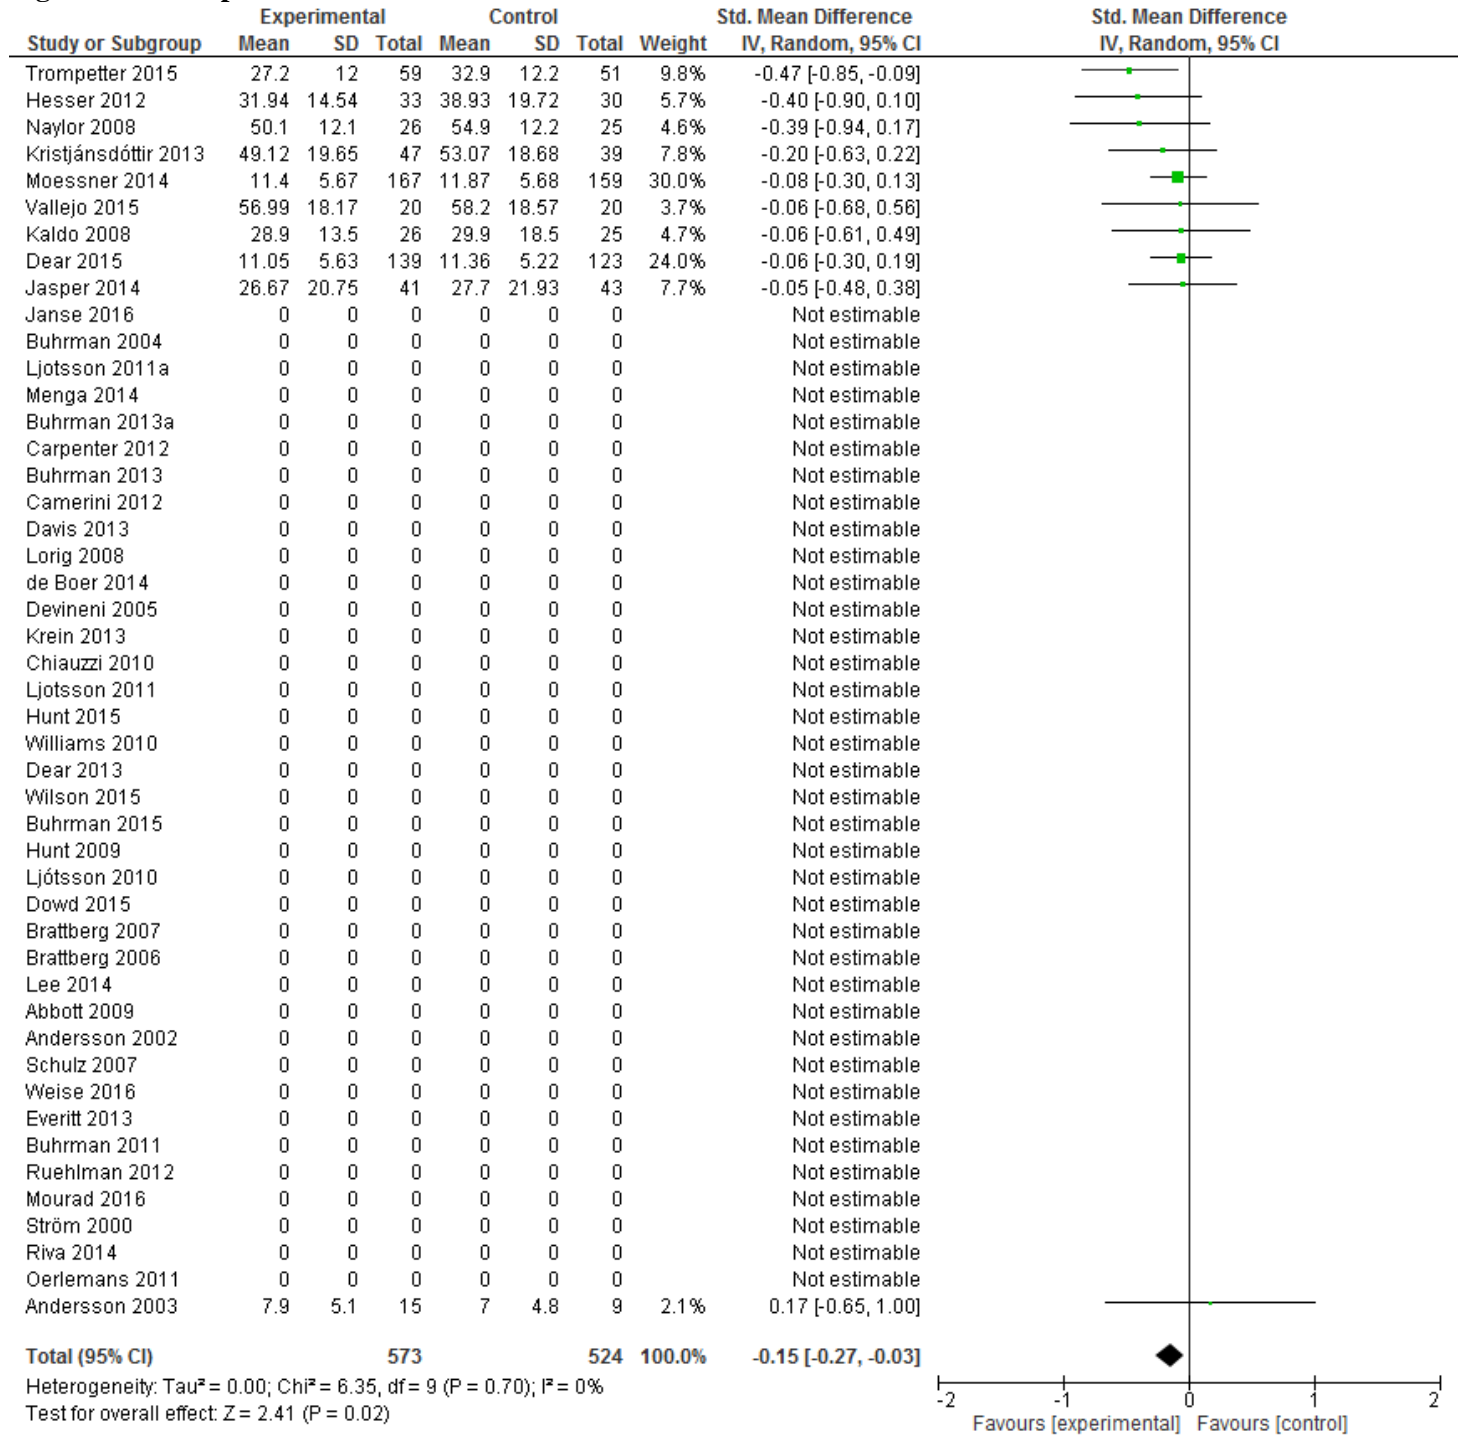

Figure T: Funnel plot

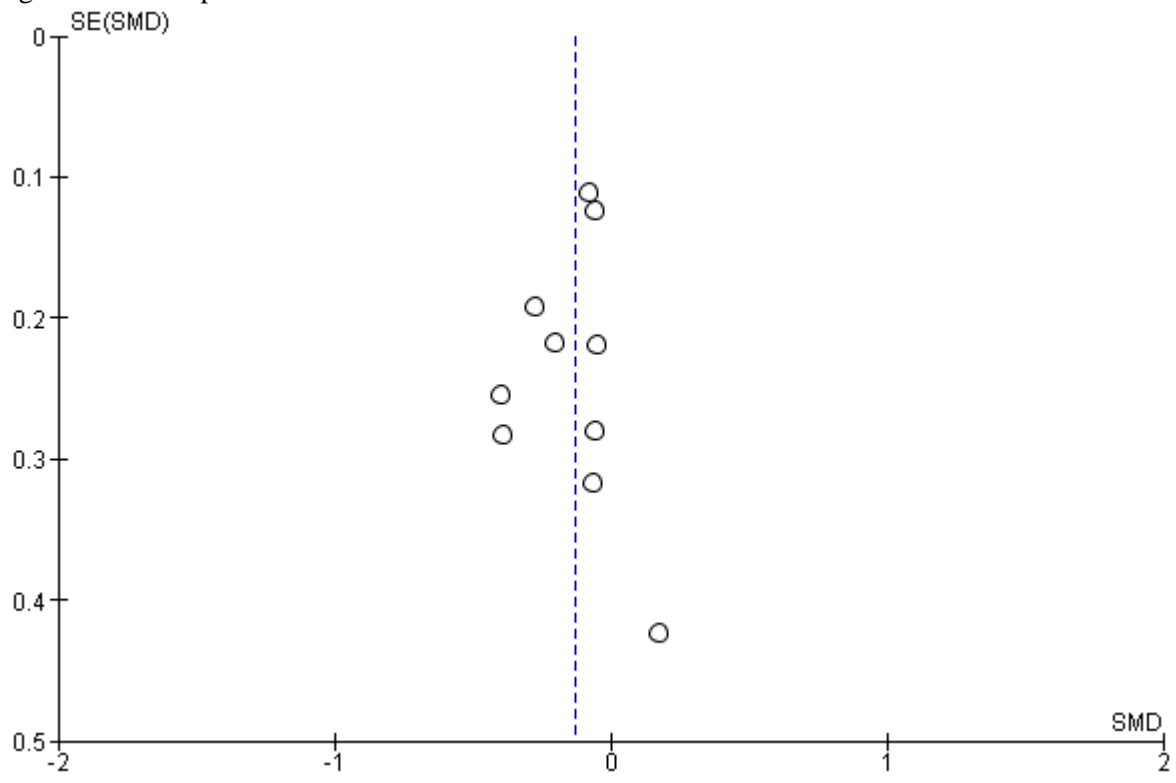

**Outcome 2.4: Catastrophizing (post)**

Number of eligible studies reporting the outcome: 10

Total number participants: 946

**Table S**

|                                                                    | <i>SMD</i> | <b>95% CI</b> | <b>I<sup>2</sup></b> | <b>P</b> |
|--------------------------------------------------------------------|------------|---------------|----------------------|----------|
| All eligible studies (k = 10)                                      | -.26       | [-.41, -.10]  | 21%                  | .25      |
| <b>SENSITIVITY ANALYSES</b>                                        |            |               |                      |          |
| <b>Internal validity</b>                                           |            |               |                      |          |
| Low risk selection bias (k = 5)                                    | -.33       | [-.49, -.17]  | 5%                   | .38      |
| Low risk attrition bias (k = 4)                                    | -.33       | [-.54, -.13]  | 0%                   | .61      |
| Low risk reporting bias (k = 3)                                    | -.16       | [-.35, .02]   | 0%                   | .99      |
| Low risk performance bias (k = 6)                                  | -.21       | [-.49, .06]   | 52%                  | .07      |
| Low risk due to incomplete data extracted (k = 4)                  | -.13       | [-.46, .20]   | 56%                  | .08      |
| Low risk detection bias                                            |            |               |                      |          |
| Low risk other bias (k = 7)                                        | -.29       | [-.42, -.15]  | 0%                   | .51      |
| <b>External validity</b>                                           |            |               |                      |          |
| Participants recruited from a general (open) population (k = 5)    | -.19       | [-.36, -.02]  | 0%                   | .93      |
| Participants recruited from a clinical (closed) population (k = 3) | -.17       | [-.83, .49]   | 72%                  | .03      |

*SMD* = Standardized mean difference, *CI* = Confidence interval, *P* = P-value for a Chi-square test for Tau; a measure of heterogeneity of standardized mean differences

Figure U: Forest plot all studies

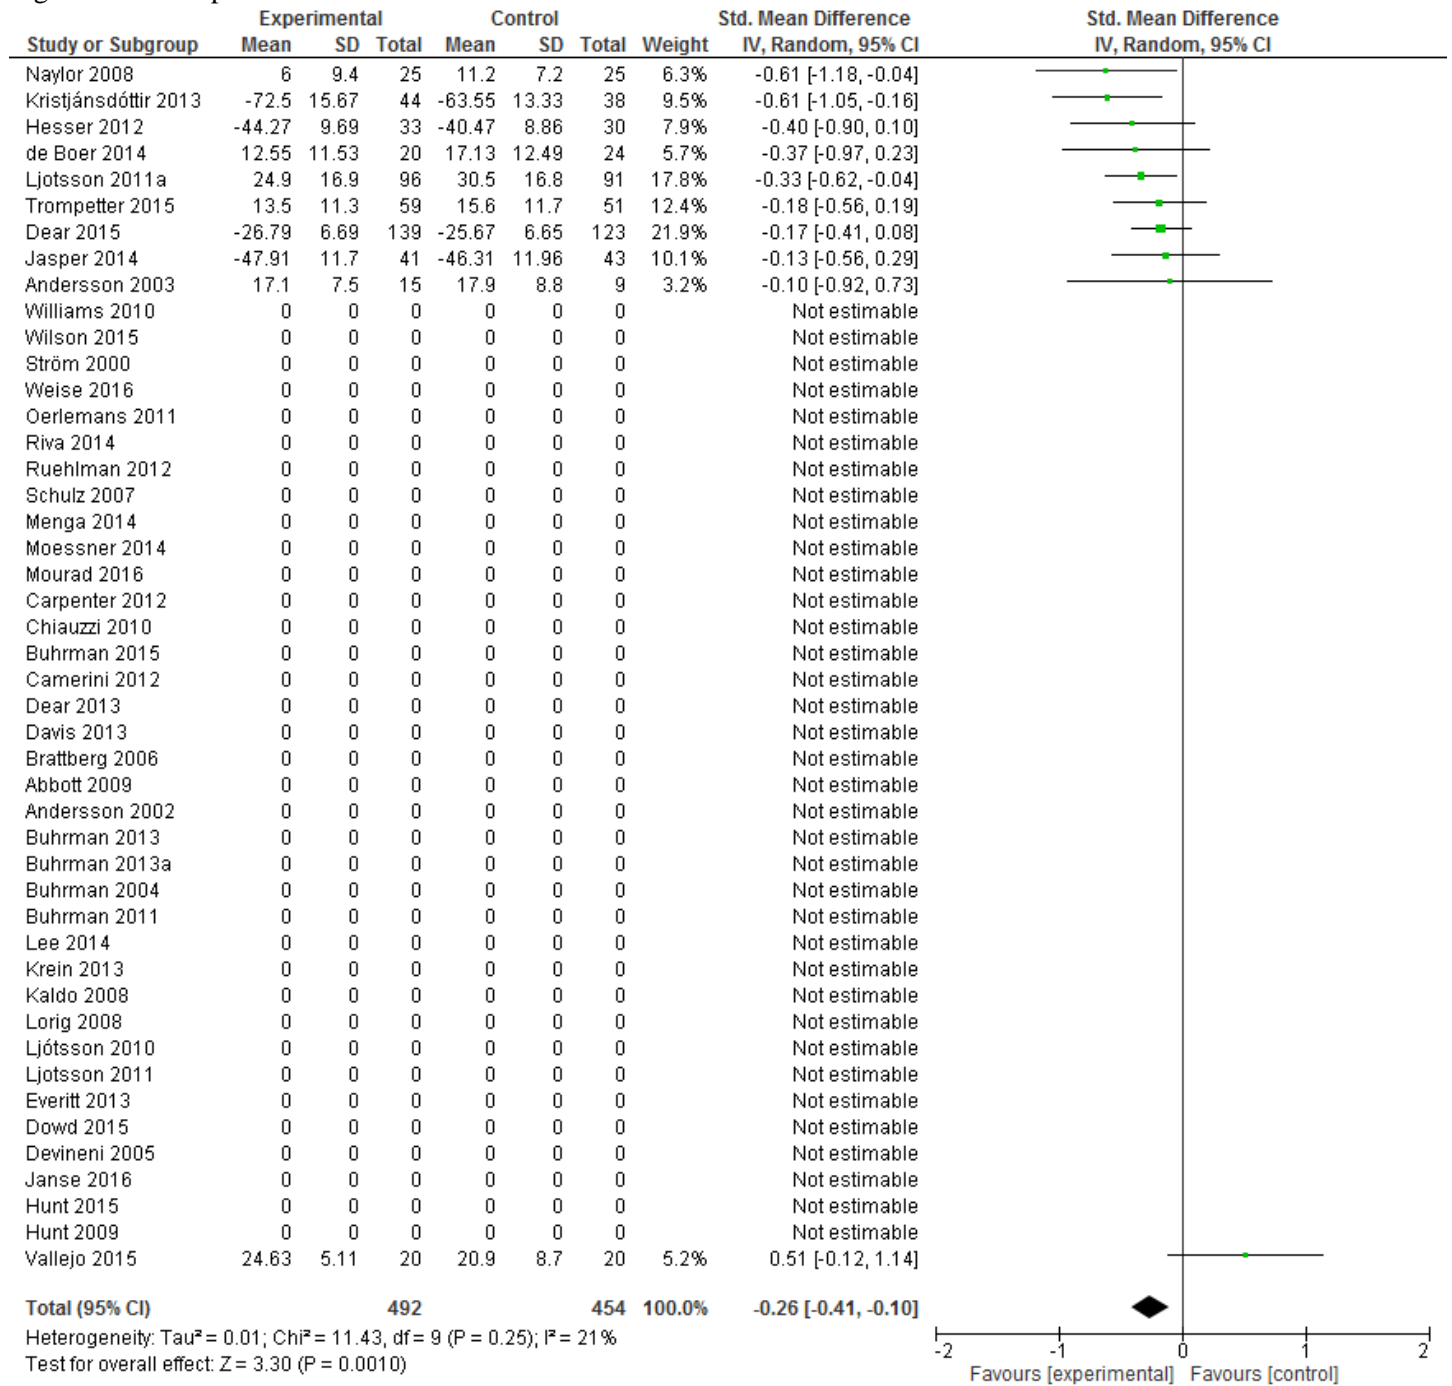

Figure V: Funnel plot

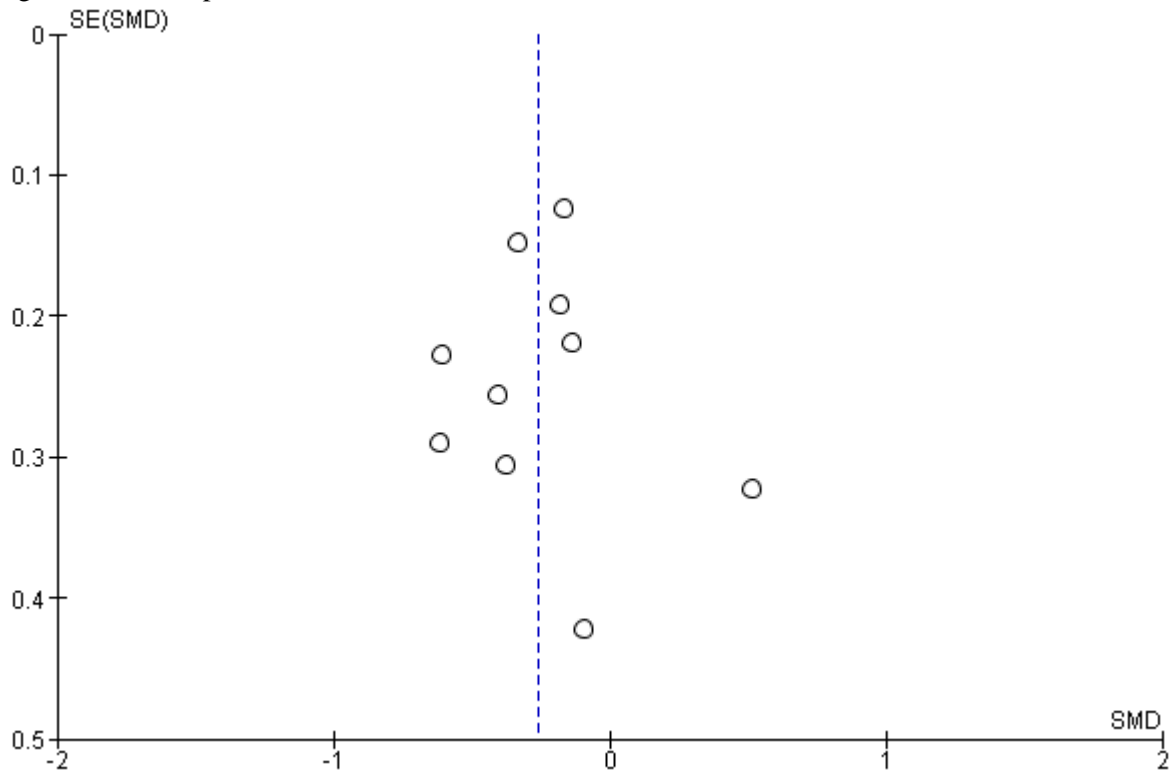

**Outcome 2.5: Depression (post)**

Number of eligible studies reporting the outcome: 8

Total number participants: 646

Table T

|                                                                    | <i>SMD</i> | <b>95% CI</b> | <b>I<sup>2</sup></b> | <b>P</b> |
|--------------------------------------------------------------------|------------|---------------|----------------------|----------|
| All eligible studies (k = 8)                                       | -.14       | [-.37, .09]   | 47%                  | .07      |
| <b>SENSITIVITY ANALYSES</b>                                        |            |               |                      |          |
| <b>Internal validity</b>                                           |            |               |                      |          |
| Low risk selection bias (k = 3)                                    | 0          | [-.22, .21]   | 0%                   | .98      |
| Low risk attrition bias (k = 4)                                    | 0          | [-.20, .20]   | 0%                   | .99      |
| Low risk reporting bias (k = 2)                                    | -.09       | [-.37, .19]   | 0%                   | .58      |
| Low risk performance bias (k = 6)                                  | -.2        | [-.55, .15]   | 60%                  | .03      |
| Low risk due to incomplete data extracted (k = 2)                  | -.63       | [-1.9, .66]   | 90%                  | .001     |
| Low risk detection bias                                            |            |               |                      |          |
| Low risk other bias (k = 5)                                        | -.03       | [-.2, .14]    | 0%                   | .96      |
| <b>External validity</b>                                           |            |               |                      |          |
| Participants recruited from a general (open) population (k = 4)    | -.06       | [-.3, .17]    | 0%                   | .92      |
| Participants recruited from a clinical (closed) population (k = 1) | /          | /             | /                    | /        |

*SMD* = Standardized mean difference, *CI* = Confidence interval, *P* = P-value for a Chi-square test for Tau; a measure of heterogeneity of standardized mean differences

Figure W: Forest plot all studies

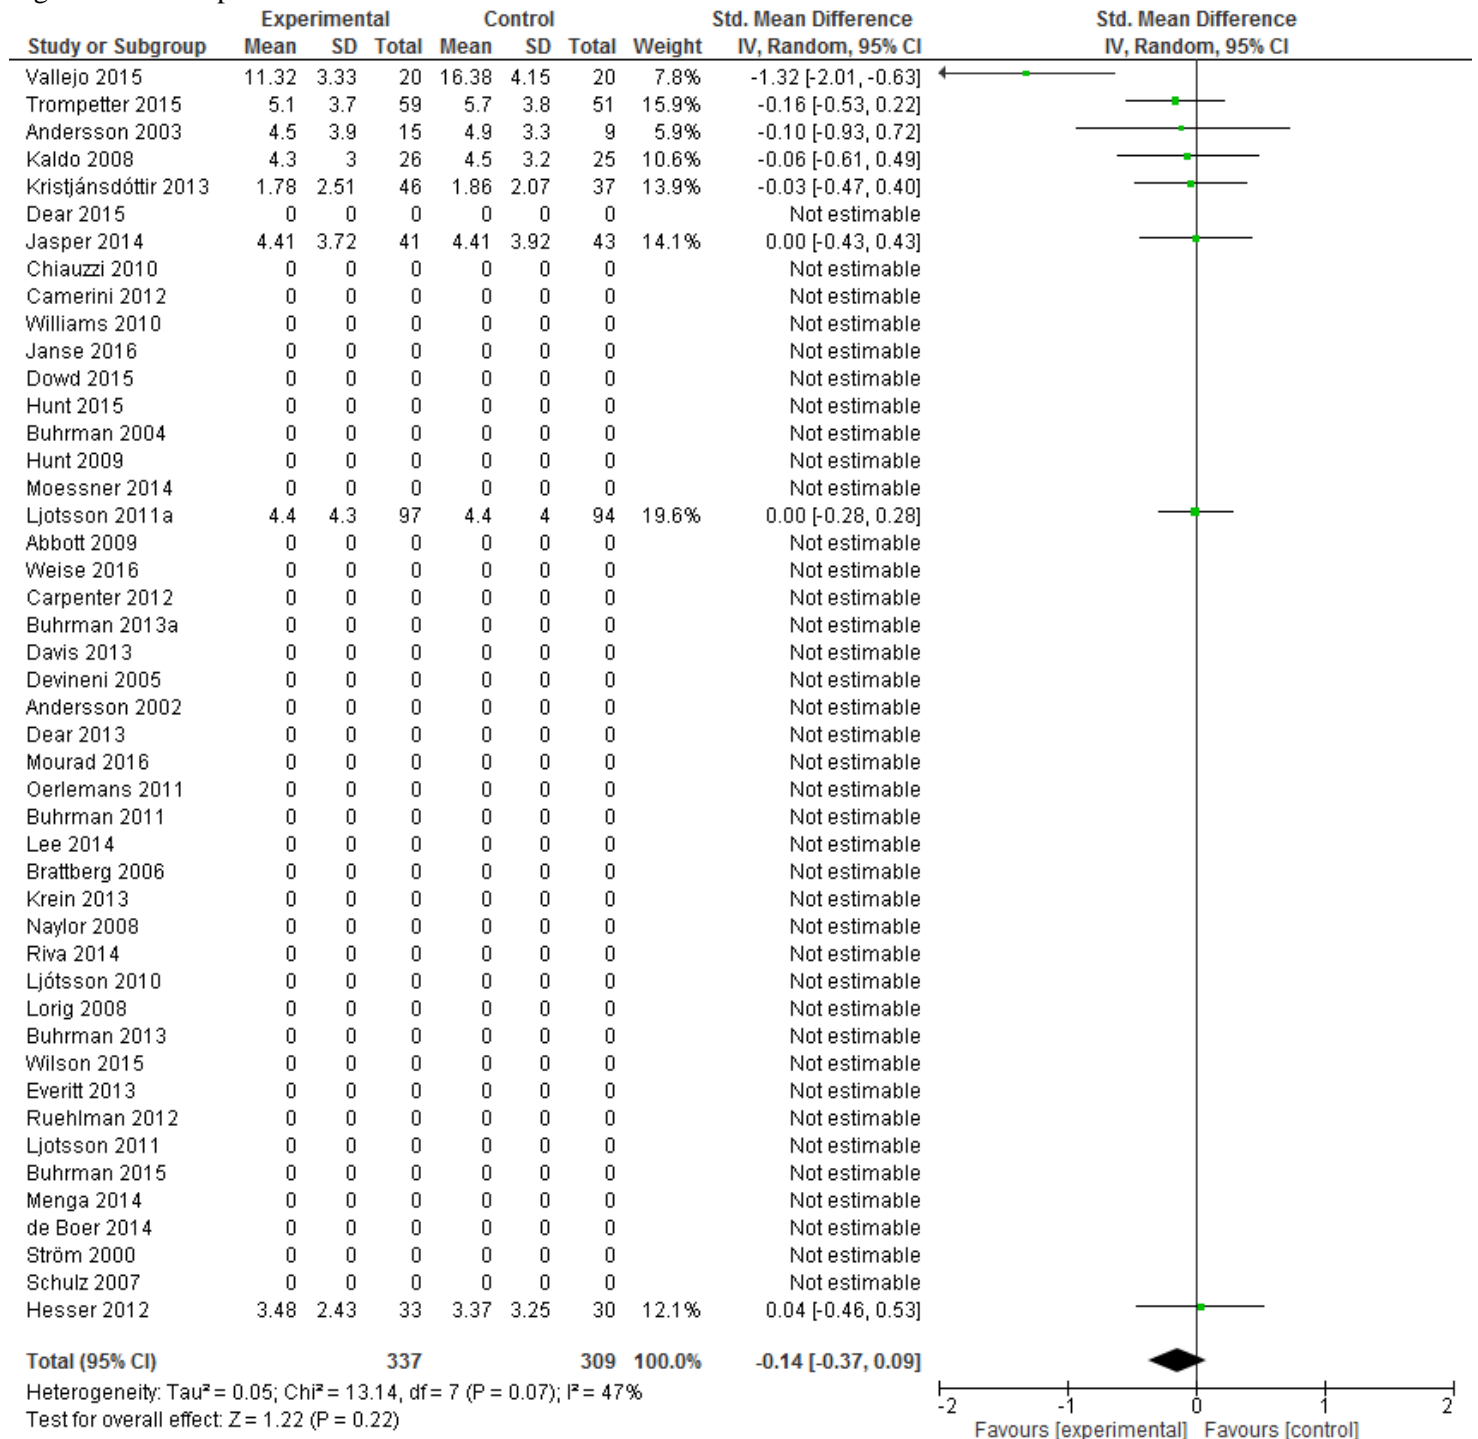

Figure X: Funnel plot

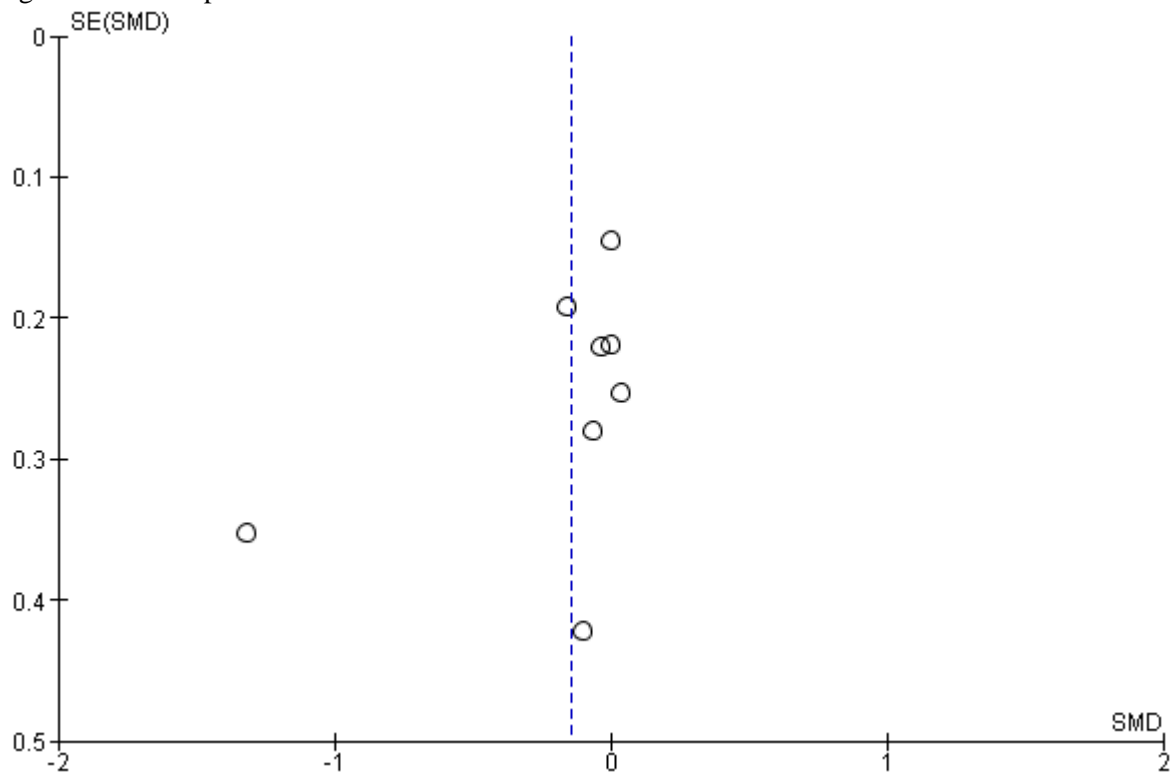



## Outcome 2.6: Symptom intensity (6 or more months at follow-up)

Number of eligible studies reporting the outcome: 5

Total number participants: 683

Table U

|                              | <i>SMD</i> | 95% CI      | <i>I</i> <sup>2</sup> | <i>P</i> |
|------------------------------|------------|-------------|-----------------------|----------|
| All eligible studies (k = 5) | -.15       | [-.40, .10] | 60%                   | .04      |

*SMD* = Standardized mean difference, *CI* = Confidence interval, *P* = P-value for a Chi-square test for Tau; a measure of heterogeneity of standardized mean differences

Figure Y: Forest plot all studies

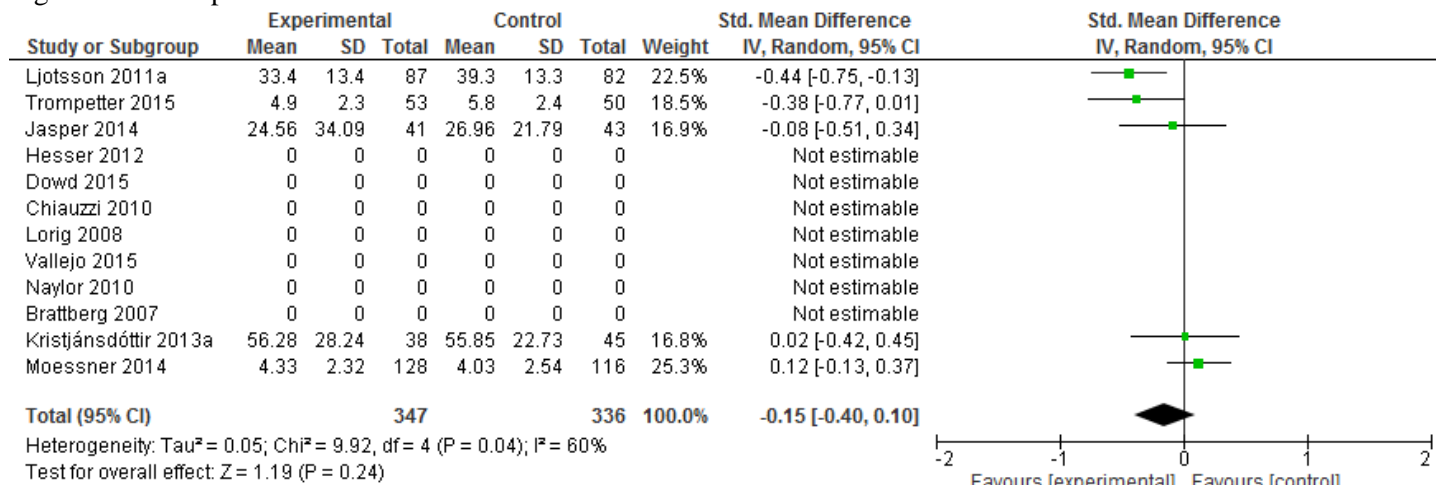

**Outcome 2.7: HRQOL (6 or more months at follow-up)**

Number of eligible studies reporting the outcome: 3

Total number participants: 461

Table V

|                              | <i>SMD</i> | <b>95% CI</b> | <b>I<sup>2</sup></b> | <b>P</b> |
|------------------------------|------------|---------------|----------------------|----------|
| All eligible studies (k = 3) | -.04       | [-.37, .30]   | 66%                  | .05      |

*SMD* = Standardized mean difference, *CI* = Confidence interval, *P* = P-value for a Chi-square test for Tau; a measure of heterogeneity of standardized mean differences

Figure Z: Forest plot

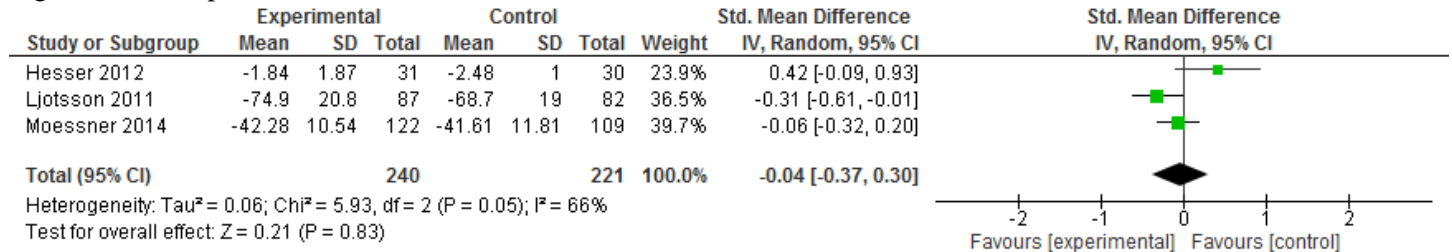

## Outcome 2.8: Functional interference (6 or more months at follow-up)

Number of eligible studies reporting the outcome: 6

Total number participants: 672

Table W

|                              | <i>SMD</i> | 95% CI      | <i>I</i> <sup>2</sup> | <i>P</i> |
|------------------------------|------------|-------------|-----------------------|----------|
| All eligible studies (k = 5) | -.20       | [-.44, .05] | 56%                   | .05      |

*SMD* = Standardized mean difference, *CI* = Confidence interval, *P* = P-value for a Chi-square test for Tau; a measure of heterogeneity of standardized mean differences

Figure AA: Forrest plot

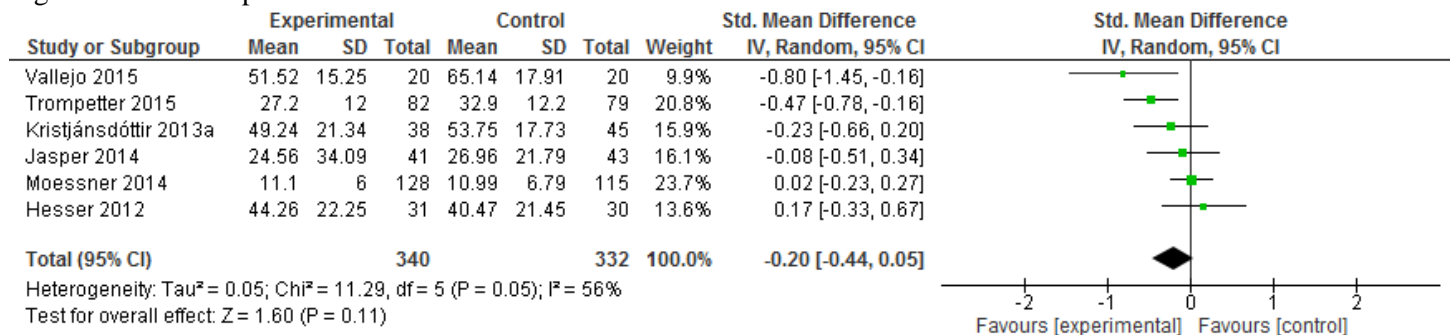

## Outcome 2.9: Catastrophizing (6 or more months at follow-up)

Number of eligible studies reporting the outcome: 5

Total number participants: 432

Table X

|                              | <i>SMD</i> | <b>95% CI</b> | <b>I<sup>2</sup></b> | <i>P</i> |
|------------------------------|------------|---------------|----------------------|----------|
| All eligible studies (k = 5) | -.27       | [-.56, .02]   | 53%                  | .08      |

*SMD* = Standardized mean difference, *CI* = Confidence interval, *P* = P-value for a Chi-square test for Tau; a measure of heterogeneity of standardized mean differences

Figure AB: Forest plot

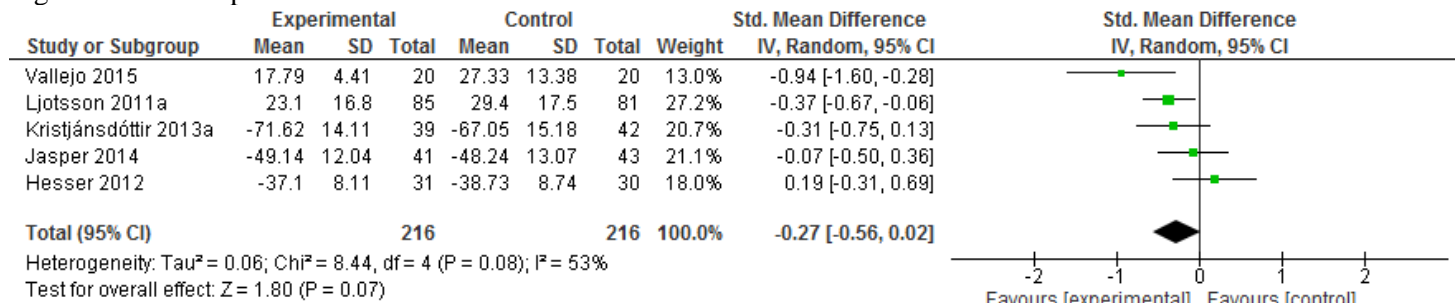

## Outcome 2.10: Depression (6 or more months at follow-up)

Number of eligible studies reporting the outcome: 6

Total number participants: 517

Table Y

|                              | <i>SMD</i> | 95% CI      | <i>I</i> <sup>2</sup> | <i>P</i> |
|------------------------------|------------|-------------|-----------------------|----------|
| All eligible studies (k = 6) | -.31       | [-.78, .16] | 85%                   | <.001    |

*SMD* = Standardized mean difference, *CI* = Confidence interval, *P* = P-value for a Chi-square test for Tau; a measure of heterogeneity of standardized mean differences

Figure 29: Forest plot

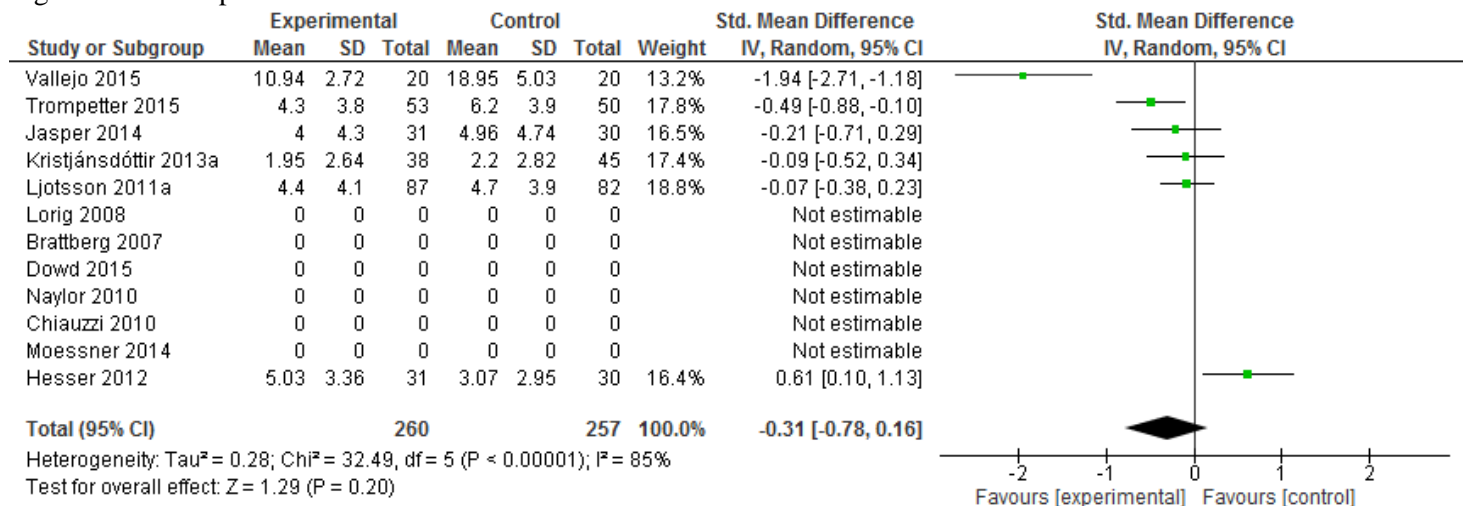

Table Z: Characteristics of sub-sets of studies with the 25% highest and 25% lowest SMD estimates

| Comparison category                                                    | CBI* vs. passive controls |                          |                          |                    |             |                         |            | CBI vs. active |                  |                          |
|------------------------------------------------------------------------|---------------------------|--------------------------|--------------------------|--------------------|-------------|-------------------------|------------|----------------|------------------|--------------------------|
|                                                                        | Any                       | Somatic symptoms         |                          | HRQOL <sup>2</sup> |             | Functional interference |            | Any            | Somatic symptoms |                          |
| Outcome category                                                       |                           | High 25%                 | Low 25%                  | High 25%           | Low 25%     | High 25%                | Low 25%    |                | High 25%         | Low 25%                  |
| Definition of study set                                                | All                       | High 25%                 | Low 25%                  | High 25%           | Low 25%     | High 25%                | Low 25%    | All            | High 25%         | Low 25%                  |
| Size study set (k)                                                     | 37                        | 7                        | 7                        | 3                  | 3           | 7                       | 7          | 15             | 2                | 2                        |
| <i>Type of control condition (k)<sup>1</sup></i>                       |                           |                          |                          |                    |             |                         |            |                |                  |                          |
| Wait-List                                                              | 14                        | 4                        | 2                        | 2                  | 0           | 2                       | 2          | n.a.           | n.a.             | n.a.                     |
| Usual/standard care                                                    | 9                         | 1                        | 2                        | 0                  | 1           | 0                       | 3          | n.a.           | n.a.             | n.a.                     |
| Message board                                                          | 8                         | 2                        | 1                        | 1                  | 0           | 4                       | 2          | n.a.           | n.a.             | n.a.                     |
| Information                                                            | 6                         | 0                        | 2                        | 0                  | 2           | 1                       | 0          | n.a.           | n.a.             | n.a.                     |
| Other CBI version                                                      | n.a.*                     | n.a.                     | n.a.                     | n.a.               | n.a.        | n.a.                    | n.a.       | 8              | 1                | 1                        |
| No CBI component                                                       | n.a.                      | n.a.                     | n.a.                     | n.a.               | n.a.        | n.a.                    | n.a.       | 3              | 1                | 1                        |
| Face-to-face group therapy                                             | n.a.                      | n.a.                     | n.a.                     | n.a.               | n.a.        | n.a.                    | n.a.       | 4              | 0                | 0                        |
| <b>Intervention</b>                                                    |                           |                          |                          |                    |             |                         |            |                |                  |                          |
| Treatment duration in weeks (mean, SD)                                 | 10.43, 9.54               | 9.86, 7.49               | 6.71 <sup>3</sup> , 0.95 | 7.00, 2.65         | 6.67, 1.16  | 10.00, 5.86             | 9.14, 7.56 | 10.87, 6.37    | 21.50, 6.36      | 6.00, 2.83               |
| <i>Theory/model mentioned (k)<sup>4</sup></i>                          |                           |                          |                          |                    |             |                         |            |                |                  |                          |
| Traditional CBT* model                                                 | 14                        | 3                        | 3                        | 2                  | 2           | 2                       | 2          | 4              | 0                | 0                        |
| Traditional CBT with other model(s)                                    | 3                         | 0                        | 0                        | 0                  | 0           | 1                       | 0          | 3              | 1                | 0                        |
| “Third wave” of CBT approach                                           | 5                         | 1                        | 1                        | 1                  | 0           | 2                       | 1          | 4              | 1                | 1                        |
| Traditional CBT inspired by “third wave”                               | 6                         | 1                        | 1                        | 0                  | 0           | 1                       | 0          | 0              | 0                | 0                        |
| No reference, author constructed, or other                             | 9                         | 2                        | 2                        | 0                  | 1           | 1                       | 4          | 4              | 0                | 1                        |
| Theory used to select techniques (item 5)                              | 17                        | 5                        | 4                        | 3                  | 0           | 2                       | 2          | 5              | 2                | 1                        |
| Explicit link between targeted construct and intervention (items 7-11) | 13                        | 5                        | 3                        | 3                  | 1           | 2                       | 3          | 7              | 2                | 1                        |
| <i>Behavioral change techniques (k)</i>                                |                           |                          |                          |                    |             |                         |            |                |                  |                          |
| Antecedents                                                            | 26                        | 4                        | 7                        | 2                  | 2           | 6                       | 4          | 1              | 0                | 0                        |
| Association                                                            | 12                        | 4                        | 1                        | 3                  | 1           | 4                       | 1          | 2              | 0                | 0                        |
| Comparison of outcome                                                  | 24                        | 4                        | 5                        | 2                  | 2           | 5                       | 2          | 6              | 1                | 1                        |
| Feedback and monitoring                                                | 23                        | 6                        | 6                        | 2                  | 3           | 5                       | 4          | 3              | 1                | 1                        |
| Goals and planning                                                     | 24                        | 3                        | 5                        | 1                  | 2           | 6                       | 3          | 2              | 0                | 1                        |
| Identity                                                               | 28                        | 6                        | 7                        | 3                  | 2           | 6                       | 4          | 4              | 1                | 1                        |
| Natural consequences                                                   | 30                        | 7                        | 7                        | 3                  | 3           | 6                       | 5          | 1              | 0                | 0                        |
| Regulation                                                             | 31                        | 5                        | 7                        | 3                  | 2           | 5                       | 6          | 2              | 1                | 1                        |
| Repetition and substitution                                            | 33                        | 6                        | 7                        | 3                  | 2           | 6                       | 5          | 6              | 2                | 1                        |
| Social support                                                         | 26                        | 4                        | 5                        | 2                  | 2           | 6                       | 2          | 4              | 0                | 2                        |
| Total amount of techniques (mean, SD)                                  | 11.92, 4.12               | 11.14, 3.85              | 14.43, 1.40              | 13.00, 1.00        | 11.67, 7.51 | 13.29, 5.27             | 9.71, 5.02 | 3.13, 3.40     | 5.00, 2.83       | 8.50 <sup>5</sup> , 6.36 |
| <i>Delivery modes</i>                                                  |                           |                          |                          |                    |             |                         |            |                |                  |                          |
| Automated functions 0-3 (mean, SD)                                     | 2.11, 0.77                | 1.71, 0.49               | 2.29, 0.76               | 1.67, 0.58         | 2.00, 0.00  | 2.14, 0.90              | 2.43, 0.53 | 1.07, 1.03     | 1.00, 0.00       | 1.50, 0.71               |
| Communicative functions 0-3 (mean, SD)                                 | 0.84, 0.65                | 0.86, 0.90               | 1.00, 0.00               | 1.00, 1.00         | 0.67, 0.58  | 1.00, 0.58              | 0.57, 0.53 | 0.73, 0.70     | 0.50, 0.71       | 0.00, 0.00               |
| Supplementary modes 0-5 (mean, SD)                                     | 2.13, 0.75                | 1.86, 0.38               | 2.43, 0.53               | 2.00, 0.00         | 2.00, 0.00  | 2.29, 0.76              | 2.29, 0.49 | 1.13, 0.99     | 0.50, 0.71       | 1.50, 2.12               |
| Total amount of MODs* 0-11 (mean, SD)                                  | 5.08, 1.34                | 4.43 <sup>6</sup> , 1.27 | 5.71, 1.25               | 4.67, 1.53         | 4.67, 0.58  | 5.43, 1.62              | 5.29, 1.25 | 2.93, 1.98     | 2.00, 0.00       | 3.00 <sup>6</sup> , 2.83 |
| <i>Provider contact (k)</i>                                            |                           |                          |                          |                    |             |                         |            |                |                  |                          |
| No provider contact                                                    | 13                        | 3                        | 2                        | 1                  | 1           | 1                       | 5          | 2              | 0                | 1                        |
| No psychologist                                                        | 4                         | 0                        | 1                        | 0                  | 1           | 0                       | 0          | 0              | 0                | 0                        |

|                                                             |               |                             |                          |             |               |               |             |                           |             |               |
|-------------------------------------------------------------|---------------|-----------------------------|--------------------------|-------------|---------------|---------------|-------------|---------------------------|-------------|---------------|
| Masters level psychologist                                  | 8             | 1                           | 1                        | 1           | 1             | 2             | 2           | 7                         | 2           | 0             |
| Clinical training                                           | 11            | 2                           | 3                        | 0           | 0             | 4             | 0           | 5                         | 0           | 1             |
| Unclear expertise                                           | 1             | 1                           | 0                        | 1           | 0             | 0             | 0           | 1                         | 0           | 0             |
| Completers intervention group (mean proportion, <i>SD</i> ) | 0.59, 0.25    | 0.52, 0.14                  | 0.34 <sup>7</sup> , 0.12 | 0.58, 0.16  | 0.28, 0.06    | 0.74, 0.26    | 0.39, 0.16  | 0.63, 0.24                | 0.58, 0.15  | 0.70, /       |
| <b>Patients</b>                                             |               |                             |                          |             |               |               |             |                           |             |               |
| Participant age (mean, <i>SD</i> )                          | 45.25, 5.53   | 38.39 <sup>8</sup> , 5.14   | 47.91, 2.68              | 36.53, 2.25 | 47.40, 2.71   | 48.67, 1.28   | 46.79, 5.12 | 47.39, 4.16               | 49.40, 4.81 | 45.75, 2.19   |
| Female (mean proportion, <i>SD</i> )                        | 0.70, 0.23    | 0.82 <sup>9</sup> , 0.10    | 0.57, 0.26               | 0.82, 0.03  | 0.61, 0.50    | 0.70, 0.19    | 0.65, 0.30  | 0.72, 0.20                | 0.80, 0.06  | 0.75, 0.35    |
| Completed tertiary education (mean proportion, <i>SD</i> )  | 0.41, 0.14    | 0.54 <sup>10</sup> , 0.08   | 0.28, 0.09               | 0.51, 0.01  | 0.41, 0.10    | 0.50, 0.09    | 0.36, 0.16  | 0.47, 0.18                | 0.70, /     | 0.31, 0.11    |
| Participants employed (mean proportion, <i>SD</i> )         | 0.65, 0.21    | 0.64, 0.22                  | 0.74, 0.37               | 0.48        | 1.00          | 0.70, 0.21    | 0.68, 0.29  | 0.66, 0.12                | 0.40, /     | 0.72, /       |
| Participants on sick leave (mean proportion, <i>SD</i> )    | 0.38, 0.27    | /                           | 0.42, 0.36               | /           | /             | 0.54, 0.44    | 0.27, 0.07  | 0.25, 0.18                | /           | 0.55, /       |
| Complaint duration in months (mean, <i>SD</i> )             | 110.73, 29.65 | 93.00 <sup>11</sup> , 39.09 | 127.16, 40.08            | 75.60, /    | 116.84, 17.93 | 125.37, 45.78 | 104.17, /   | 122.57, 28.29             | 133.80, /   | 136.94, 48.41 |
| HADS* depression (mean proportion, <i>SD</i> )              | 6.95, 1.38    | /                           | 6.70, 2.02               | /           | 4.90          | 8.08, 1.47    | 6.2         | 5.83 <sup>12</sup> , 0.52 | 6.20, /     | /             |
| <b>Patient condition (k)</b>                                |               |                             |                          |             |               |               |             |                           |             |               |
| Chronic pain                                                | 13            | 0                           | 3                        | 0           | 0             | 4             | 3           | 4                         | 2           | 0             |
| Chronic (low) back pain                                     | 4             | 0                           | 1                        | 0           | 0             | 0             | 1           | 2                         | 0           | 1             |
| Fibromyalgia/ chronic widespread pain                       | 4             | 0                           | 0                        | 0           | 0             | 1             | 0           | 3                         | 0           | 1             |
| Headache                                                    | 2             | 1                           | 0                        | 0           | 0             | 0             | 1           | 1                         | 0           | 0             |
| Chronic fatigue                                             | 1             | 1                           | 0                        | 0           | 0             | 0             | 0           | 0                         | 0           | 0             |
| Irritable Bowel Syndrome                                    | 6             | 4                           | 1                        | 3           | 1             | 0             | 0           | 2                         | 0           | 0             |
| Interstitial cystitis                                       | 1             | 1                           | 0                        | 0           | 1             | 0             | 1           | 0                         | 0           | 0             |
| Non-cardiac chest pain                                      | 1             | 0                           | 0                        | 0           | 0             | 0             | 0           | 0                         | 0           | 0             |
| Tinnitus                                                    | 5             | 0                           | 2                        | 0           | 1             | 2             | 1           | 3                         | 0           | 0             |
| <b>Computer literacy selection criteria (k)</b>             |               |                             |                          |             |               |               |             |                           |             |               |
| Implicit                                                    | 7             | 4 <sup>13</sup>             | 1                        | 3           | 1             | 0             | 0           | 3                         | 0           | 1             |
| Explicit (able to use required technology)                  | 27            | 1                           | 6                        | 0           | 1             | 7             | 6           | 11                        | 2           | 0             |
| Requires other platform or run-in period                    | 3             | 2                           | 0                        | 0           | 1             | 0             | 1           | 1                         | 0           | 1             |

Comment: table only includes outcomes reported in 10 or more studies, and for which heterogeneity in pooled SMDs was statistically significant and  $I^2$  more than 40%.

\*Abbreviations: CBI = Computer-based intervention, HRQOL = Health-related quality of life, N.A. = Not applicable, / = no data, CBT = Cognitive Behavioral Therapy, BCT = Behavioral Change Technique, MOD = Mode of Delivery, HADS = Hospital Anxiety and Depression Scale.

<sup>1</sup> Sub-groups for type of control were made in accordance with the categories in the table.

<sup>2</sup> Two markedly small studies were in the set of studies with high post-treatment SMDs for HRQOL ( $k = 3$ ). Replacement of these studies by two other studies with relatively high SMDs did not affect the selection of potentially distinctive characteristics for sub-group analysis.

<sup>3</sup> Treatment duration: subsequent sub-group analyses distinguished between studies with a duration of up to 6 weeks, 7-10 weeks, or more than 10 weeks.

<sup>4</sup> Sub-groups for “use of theory” are: no CBT model, traditional CBT, 3<sup>rd</sup> wave model (Mindfulness-based or Acceptance and commitment therapy), or 3<sup>rd</sup> wave inspired.

<sup>5</sup> Number of BCTs sub-groups are: 0 or unclear, 1-3, more than 3

<sup>6</sup> Number of MODs sub-groups are: (for intervention versus passive controls) 0-4, 5, or more than 5, and (for intervention versus active controls) 0-2, or more than 2. Number of automated, communicative, supplementary modes groups are: 0, 1, and more than 1.

<sup>7</sup> Compliance: 50% of intervention group treatment completers was the cut-off point used for sub-group analyses.

<sup>8</sup> Average participant age groups are: up to 42.5, between 42.5 and 49, or more than 49 years of age.

<sup>9</sup> Average female proportion groups are: less than 2/3, between 2/3 and 4/5, and more than 4/5.

<sup>10</sup> Average proportion of participants with tertiary education groups are: up to 40%, and more than 40%.

<sup>11</sup> Symptom duration groups are: up to 100 months on average, and more than 100 months on average.

<sup>12</sup> Average (baseline) HADS scores were categorized as: up to 7 (probably not depressed), or higher than 7 (depression is probable)

<sup>13</sup> Computer literacy selection criteria groups are: explicit vs. other.

Table AA: Overview of sub-group analyses

| Outcome category                                                       | Sub-group definition                                                                                                                                                                                                                                                        | CBI vs. active                                                |                                                                |                                                                | CBI vs. active                                              |
|------------------------------------------------------------------------|-----------------------------------------------------------------------------------------------------------------------------------------------------------------------------------------------------------------------------------------------------------------------------|---------------------------------------------------------------|----------------------------------------------------------------|----------------------------------------------------------------|-------------------------------------------------------------|
|                                                                        |                                                                                                                                                                                                                                                                             | Somatic symptoms                                              | HRQOL <sup>2</sup>                                             | Functional interference                                        | Somatic symptoms                                            |
| Type of control condition within passive controls                      | <ul style="list-style-type: none"> <li>- Waiting list</li> <li>- Usual/standard care</li> <li>- Message board</li> <li>- Information</li> <li>- Other CBI version</li> <li>- No CBI component</li> <li>- Face-to-face group therapy</li> </ul>                              | Chi <sup>2</sup> = 12.79, (P = 0.005), I <sup>2</sup> = 76.5% | Chi <sup>2</sup> = 19.37, (P = 0.0002), I <sup>2</sup> = 84.5% | Chi <sup>2</sup> = 22.73, (P < 0.0001), I <sup>2</sup> = 86.8% |                                                             |
| <u>Intervention</u>                                                    |                                                                                                                                                                                                                                                                             |                                                               |                                                                |                                                                |                                                             |
| Treatment duration in weeks (mean, SD)                                 | <ul style="list-style-type: none"> <li>- &lt;= 6 weeks</li> <li>- 7-10 weeks</li> <li>- &gt;10 weeks</li> </ul>                                                                                                                                                             | Chi <sup>2</sup> = 1.29, (P = 0.52), I <sup>2</sup> = 0%      |                                                                | Chi <sup>2</sup> = 5.51, (P = 0.06), I <sup>2</sup> = 63.7%    | Chi <sup>2</sup> = 2.08 (P = 0.35), I <sup>2</sup> = 3.6%   |
| Theory/model mentioned                                                 | <ul style="list-style-type: none"> <li>- Traditional CBT* model</li> <li>- Traditional CBT with other model(s)</li> <li>- "Third wave" of CBT approach</li> <li>- Traditional CBT inspired by "third wave"</li> <li>- No reference, author constructed, or other</li> </ul> |                                                               | Chi <sup>2</sup> = 8.10, (P = 0.04), I <sup>2</sup> = 63.0%    | Chi <sup>2</sup> = 1.45, (P = 0.69), I <sup>2</sup> = 0%       |                                                             |
| Theory used to select techniques (item 5)                              |                                                                                                                                                                                                                                                                             |                                                               | Chi <sup>2</sup> = 5.79, (P = 0.02), I <sup>2</sup> = 82.7%    |                                                                |                                                             |
| Explicit link between targeted construct and intervention (items 7-11) |                                                                                                                                                                                                                                                                             |                                                               | Chi <sup>2</sup> = 1.90, (P = 0.17), I <sup>2</sup> = 47.5%    |                                                                |                                                             |
| Antecedents                                                            |                                                                                                                                                                                                                                                                             | Chi <sup>2</sup> = 1.68, (P = 0.19), I <sup>2</sup> = 40.6%   |                                                                | Chi <sup>2</sup> = 1.13, (P = 0.29), I <sup>2</sup> = 11.5%    |                                                             |
| Association (i.e. 7.7 exposure)                                        | <ul style="list-style-type: none"> <li>- Present</li> <li>- Not present</li> </ul>                                                                                                                                                                                          | Chi <sup>2</sup> = 6.26, (P = 0.01), I <sup>2</sup> = 84.0%   | Chi <sup>2</sup> = 2.24, (P = 0.13), I <sup>2</sup> = 55.4%    | Chi <sup>2</sup> = 3.72, (P = 0.05), I <sup>2</sup> = 73.1%    |                                                             |
| Comparison of outcome                                                  |                                                                                                                                                                                                                                                                             |                                                               |                                                                | Chi <sup>2</sup> = 1.99, (P = 0.16), I <sup>2</sup> = 49.7%    |                                                             |
| Goals and planning                                                     |                                                                                                                                                                                                                                                                             |                                                               |                                                                | Chi <sup>2</sup> = 0.95, (P = 0.33), I <sup>2</sup> = 0%       |                                                             |
| Identity                                                               |                                                                                                                                                                                                                                                                             |                                                               |                                                                | Chi <sup>2</sup> = 3.60, (P = 0.06), I <sup>2</sup> = 72.3%    |                                                             |
| Repetition and substitution                                            |                                                                                                                                                                                                                                                                             |                                                               |                                                                |                                                                | Chi <sup>2</sup> = 0.59, (P = 0.44), I <sup>2</sup> = 0%    |
| Social support                                                         |                                                                                                                                                                                                                                                                             |                                                               |                                                                | Chi <sup>2</sup> = 3.62, (P = 0.06), I <sup>2</sup> = 72.4%    | Chi <sup>2</sup> = 1.76, (P = 0.18), I <sup>2</sup> = 43.3% |
| Total amount of techniques (versus active controls)                    | <ul style="list-style-type: none"> <li>- 0 or unclear</li> <li>- 1-3</li> <li>- &gt; 3</li> </ul>                                                                                                                                                                           |                                                               |                                                                |                                                                | Chi <sup>2</sup> = 0.97 (P = 0.62), I <sup>2</sup> = 0%     |
| Automated functions                                                    | <ul style="list-style-type: none"> <li>- 0</li> <li>- 1</li> <li>- &gt; 1</li> </ul>                                                                                                                                                                                        |                                                               |                                                                |                                                                | Chi <sup>2</sup> = 0.86, (P = 0.35), I <sup>2</sup> = 0%    |
| Communicative functions                                                | <ul style="list-style-type: none"> <li>- 0</li> <li>- 1</li> <li>- &gt; 1</li> </ul>                                                                                                                                                                                        |                                                               | Chi <sup>2</sup> = 2.87, (P = 0.24), I <sup>2</sup> = 30.4%    |                                                                |                                                             |
| Supplementary modes                                                    | <ul style="list-style-type: none"> <li>- 0</li> <li>- 1</li> </ul>                                                                                                                                                                                                          |                                                               |                                                                |                                                                | Chi <sup>2</sup> = 2.13                                     |



|                                                |                                                                                                                                                                                                                              |                                                                     |                                                                      |                                                                   |                                                                   |
|------------------------------------------------|------------------------------------------------------------------------------------------------------------------------------------------------------------------------------------------------------------------------------|---------------------------------------------------------------------|----------------------------------------------------------------------|-------------------------------------------------------------------|-------------------------------------------------------------------|
|                                                | - > 1                                                                                                                                                                                                                        |                                                                     |                                                                      |                                                                   | (P = 0.34),<br>I <sup>2</sup> = 6.2%                              |
| Peer-to-peer access                            | - Present<br>- Not present                                                                                                                                                                                                   |                                                                     | Chi <sup>2</sup> = 1.96,<br>(P = 0.16),<br>I <sup>2</sup> = 48.9%    |                                                                   |                                                                   |
| Total amount of MODs (versus passive controls) | - 0-4<br>- 5<br>- > 5                                                                                                                                                                                                        | Chi <sup>2</sup> = 6.34,<br>(P = 0.04),<br>I <sup>2</sup> = 68.4%   |                                                                      |                                                                   |                                                                   |
| Total amount of MODs (versus active controls)  | - 0-2<br>- > 2                                                                                                                                                                                                               |                                                                     |                                                                      |                                                                   | Chi <sup>2</sup> = 5.11,<br>(P = 0.02),<br>I <sup>2</sup> = 80.4% |
| Provider presence and training level           | - No psychologist<br>- Other<br>- Masters level psychologist<br>- Clinical training                                                                                                                                          |                                                                     |                                                                      | Chi <sup>2</sup> = 9.84,<br>(P = 0.02),<br>I <sup>2</sup> = 69.5% |                                                                   |
| Completers intervention group                  | - < 50%<br>- =< 50%                                                                                                                                                                                                          | Chi <sup>2</sup> = 4.55,<br>(P = 0.03)<br>I <sup>2</sup> = 78.0%    |                                                                      | Chi <sup>2</sup> = 2.30,<br>(P = 0.13),<br>I <sup>2</sup> = 56.6% |                                                                   |
| Participant age (years)                        | - < 42.5<br>- => 42.5 & =< 49<br>- >49                                                                                                                                                                                       | Chi <sup>2</sup> = 11.45,<br>(P = 0.003),<br>I <sup>2</sup> = 82.5% | Chi <sup>2</sup> = 15.11,<br>(P = 0.0001),<br>I <sup>2</sup> = 93.4% |                                                                   |                                                                   |
| Female (mean proportion, SD)                   | - < 2/3<br>- => 2/3 & =< 4/5<br>- >4/5                                                                                                                                                                                       | Chi <sup>2</sup> = 9.19,<br>(P = 0.01), I <sup>2</sup> =<br>78.2%   | Chi <sup>2</sup> = 4.30,<br>(P = 0.12),<br>I <sup>2</sup> = 53.5%    |                                                                   |                                                                   |
| Completed tertiary education                   | - =<40%<br>- >40%                                                                                                                                                                                                            | Chi <sup>2</sup> = 5.46<br>(P = 0.02), I <sup>2</sup> =<br>81.7%    | >10                                                                  |                                                                   |                                                                   |
| Participants on sick leave                     | - < 50%<br>- => 50%                                                                                                                                                                                                          |                                                                     |                                                                      | Chi <sup>2</sup> = 3.73,<br>(P = 0.05),<br>I <sup>2</sup> = 73.2% |                                                                   |
| Complaint duration in months                   | - < 100 months<br>- 100 months or more                                                                                                                                                                                       | Chi <sup>2</sup> = 2.13,<br>(P = 0.14),<br>I <sup>2</sup> = 53.0%   |                                                                      |                                                                   |                                                                   |
| HADS* depression                               | - =< 7<br>- >7                                                                                                                                                                                                               |                                                                     |                                                                      | Chi <sup>2</sup> = 5.32,<br>(P = 0.02), I <sup>2</sup> =<br>81.2% |                                                                   |
| Patient condition                              | - Chronic pain<br>- Chronic (low) back pain<br>- Fibromyalgia/ chronic widespread pain<br>- Headache<br>- Chronic fatigue<br>- Irritable Bowel Syndrome<br>- Interstitial cystitis<br>- Non-cardiac chest pain<br>- Tinnitus | Chi <sup>2</sup> = 15.62,<br>(P = 0.03),<br>I <sup>2</sup> = 55.2%  | Chi <sup>2</sup> = 8.36,<br>(P = 0.08),<br>I <sup>2</sup> = 52.2%    |                                                                   |                                                                   |
| Computer literacy selection criteria           | - Explicit<br>- Other (able to use required technology / other platform / run-in period?)                                                                                                                                    | Chi <sup>2</sup> = 4.79,<br>(P = 0.03),<br>I <sup>2</sup> = 79.1%   |                                                                      |                                                                   |                                                                   |

Symbols and abbreviations: CBI = Computer-based Intervention, HRQOL = Health Related Quality of Life, Chi<sup>2</sup> = Chi-Square test statistic, P = P-Value, I<sup>2</sup> = Heterogeneity statistic, CBT = Cognitive Behavioural Therapy
